1  
2  
3  
4  
5  
6  
7  
8  
9  
10  
11  
12  
13  
14  
15  
16  
17

## Competition between parallel sensorimotor learning systems

Scott T. Albert<sup>1</sup>, Jihoon Jang<sup>1</sup>, Adrian M. Haith<sup>2</sup>, Gonzalo Lerner<sup>3</sup>, Valeria Della-Maggiore<sup>3</sup>, John W. Krakauer<sup>2,4,5</sup>, and Reza Shadmehr<sup>1,4</sup>

1. Department of Biomedical Engineering, Johns Hopkins School of Medicine, Baltimore MD
2. Department of Neurology, Johns Hopkins School of Medicine, Baltimore MD
3. Departamento de Fisiología y Biofísica, Universidad de Buenos Aires, Buenos Aires, Argentina
4. Department of Neuroscience, Johns Hopkins School of Medicine, Baltimore MD
5. The Santa Fe Institute, Santa Fe, NM

**Correspondence:** Scott Albert, 416 Traylor Building, Johns Hopkins School of Medicine, 720 Rutland Ave., Baltimore, MD 21205, USA. Email: salbert8@jhmi.edu. Phone: 410-614-3424.

**Acknowledgements:** This work was supported by grants from the National Institutes of Health (R01NS078311, F32NS095706), and the National Science Foundation (CNS-1714623).

## 18 **Abstract**

19 Sensorimotor adaptation benefits from learning in two parallel systems: one that has access to explicit  
20 knowledge, and another that relies on implicit, unconscious correction. However, it is unclear how these  
21 systems interact: does enhancing one system's contributions, for example through instruction, impair the  
22 other, or do they learn independently? Here we illustrate that certain contexts can lead to competition  
23 between implicit and explicit learning. In some cases, each system is responsive to a task-related visual  
24 error. This shared error appears to create competition between these systems, such that when the explicit  
25 system increases its response, errors are siphoned away from the implicit system, thus reducing its  
26 learning. This model suggests that explicit strategy can mask changes in implicit error sensitivity related  
27 to savings and interference. Other contexts suggest that the implicit system can respond to multiple error  
28 sources. When these error sources conflict, a second type of competition occurs. Thus, the data show that  
29 during sensorimotor adaptation, behavior is shaped by competition between parallel learning systems.

30

## 31 **Introduction**

32 When we reach towards an object, unexpected perturbations to the arm engage multiple corrective  
33 systems. Some systems are reactive and respond online to counter the perturbation<sup>1-3</sup>, whereas others  
34 are predictive, changing their output to anticipate the perturbation<sup>4-6</sup>. When multiple predictive systems  
35 operate together, how do they coordinate their responses to error?

36 One possibility is that each learning system operates on a separate error source. For example,  
37 when people adapt to a visual perturbation and an inertial perturbation simultaneously, the brain engages  
38 parallel circuits<sup>7</sup> that respond to each error separately without interference<sup>8</sup>. In other cases, however,  
39 separate corrective systems may respond to a common error. For example, current models suggest that  
40 a given sensory error simultaneously engages multiple adaptive systems, each with their own timescale  
41 of learning: some fast and others slow<sup>9,10</sup>.

42 Presence of multiple learning systems in the brain makes it crucial to understand how they are  
43 coordinated to seamlessly improve behavior. First, suppose two learning systems are driven by the same  
44 error and produce an output that reduces that error (Fig. 1A). In this case, when one system adapts, it  
45 reduces the error that is available to drive learning in the other system; thus, these two parallel systems  
46 will compete to "consume" a common error. Second, suppose two systems are driven by distinct errors,  
47 each producing an output to minimize its own error (Fig. 1B). In this case, when one system adapts to its  
48 error, the resulting action could increase the other system's error, thus producing another type of  
49 competition where only one system can minimize its error. These ideas illustrate that a given system's  
50 behavior will depend not only on its own error source, but the error sources that drive parallel learning  
51 systems.

52 Here we consider how these competitive interactions may couple together neural systems that  
53 respond to visual errors. Multiple lines of evidence suggest that the brain engages two parallel systems  
54 during motor learning: a strategic explicit system that can be guided by instruction<sup>11,12</sup>, as well as an  
55 implicit system that adapts without our conscious awareness<sup>12,13</sup>. How might these learning systems  
56 interact<sup>14-16</sup> during sensorimotor adaptation?

57 The answer depends on their respective error sources. Current models suggest that implicit and  
58 explicit systems are differentially engaged by two distinct error sources: a task error<sup>17-19</sup>, and a prediction  
59 error<sup>4,12,20</sup>. One theory suggests that the explicit system acts to decrease errors in task performance, while

60 the implicit system acts to reduce errors in predicting sensory outcomes<sup>12,21,22</sup>. However, other models  
61 have suggested that both systems are at least partly engaged by errors in task outcome<sup>14,17,23,24</sup>. Here we  
62 show that both errors drive implicit learning, but their relative contributions vary across different  
63 experiments. Some experiments reveal how learning systems exhibit competition due to a common error  
64 source as in Fig. 1A, but in others, they interfere given a conflict between separate errors as in Fig. 1B.

65 Critically, one's viewpoint can lead to contrasting interpretations of the same data. Consider the  
66 case where implicit and explicit systems share at least one common error source. Suppose some  
67 experimental condition facilitates explicit strategy. In this case, increases in explicit strategy will siphon  
68 away the error that the implicit system needs to adapt, thus reducing implicit learning without actually  
69 changing implicit learning properties.

70 Changes in implicit learning might occur not solely across two distinct environments, but across  
71 two moments in time. For example, when two opposing perturbations are learned in sequence, the rate  
72 of learning decreases due to interference<sup>25-27</sup>. On the other hand, when the perturbations are the same,  
73 the rate of learning increases due to savings<sup>28-32</sup>. If implicit and explicit systems share an error source,  
74 each system's current response can be shaped not solely by past experience, but also by changes in the  
75 other system. This may explain a potential disconnect between studies that have suggested that  
76 experience-dependent increases in learning rate are subserved solely by flexible explicit strategies<sup>28,33-36</sup>,  
77 and studies that have pointed to concomitant changes in implicit learning systems<sup>17,37,38</sup>.

78 Here, we mathematically<sup>9,14,24,39,40</sup> consider the extent to which implicit and explicit systems are  
79 engaged by common errors, or separate errors. The hypotheses make diverging predictions, which we  
80 then test in various contexts. In some contexts, the data suggest that the two systems are mostly driven  
81 by a common error. This shared error produces competition as in Fig. 1A, such that increases<sup>15,16</sup> or  
82 decreases<sup>41,42</sup> in explicit strategy indirectly exert the opposite effect on implicit learning. This competitive  
83 relationship suggests an alternate way that implicit systems may exhibit two hallmarks of learning: savings  
84 and interference. However, in other contexts, a single common error cannot explain implicit behavior. In  
85 these cases, the data are more consistent with the idea that multiple error sources (e.g., a prediction and  
86 a task error) drive comparable levels of implicit learning, leading to competition resembling Fig. 1B.

87 Together, our results illustrate that changes in behavior during sensorimotor adaptation are  
88 shaped by multiple types of competition between parallel learning systems.

89

## 90 Results

91 In visuomotor rotation paradigms, participants move a cursor with their hand (Fig. 1C), but experience a  
92 perturbation that changes the canonical relationship between hand motion and cursor motion. The  
93 perturbation induces adaptation, resulting in a change in reach direction. This adaptation is supported by  
94 both implicit and explicit processes<sup>11,12,21,43</sup>; participants can intentionally re-aim their reach angle (Fig. 1C,  
95 aim), and also change their reach via implicit recalibration (Fig. 1C, implicit). Together, these two systems  
96 determine the hand's path (Fig. 1C, hand).

97 Suppose that a rotation  $r$  alters the cursor's path (Fig. 1C, cursor). Current models suggest that  
98 this perturbation creates two distinct error sources. One error source is created by the deviation between  
99 the cursor and the target: a target error<sup>17-19</sup>. Notably, this target error (Fig. 1C, target error) is altered by  
100 both implicit ( $x_i$ ) and explicit ( $x_e$ ) adaptation:

101 
$$e_{target}^{(n)} = r^{(n)} - (x_i^{(n)} + x_e^{(n)}) \quad (1)$$

102 Under normal circumstances, the brain expects that the cursor will move toward the aimed  
103 location. This expectation gives rise to a second error: a sensory prediction error (SPE)<sup>4,12,20</sup>. This SPE is  
104 created by the deviation between where we aimed our hand (the expected cursor motion) and where we  
105 observed the cursor's actual motion (Fig. 1C, sensory prediction error). Critically, because this error is  
106 anchored to our aim location, it is altered solely by changes in the implicit system:

107 
$$e_{SPE}^{(n)} = r^{(n)} - x_i^{(n)} \quad (2)$$

108 These errors create two different objective functions: (1) maximize success by eliminating target  
109 error, and (2) improve our predictions by eliminating SPE. How does the brain's subconscious learning  
110 system respond to these disparate directives? State-space models describe implicit adaptation as a  
111 process of learning and forgetting<sup>9,14,24,39,40</sup>:

112 
$$x_i^{(n+1)} = a_i x_i^{(n)} + b_i e^{(n)} \quad (3)$$

113 Forgetting is controlled by the retention factor ( $a_i$ ) which specifies how strongly we retain the adapted  
114 state. Learning is controlled by one's error sensitivity ( $b_i$ ) which determines the amount we adapt in  
115 response to an error – but which error?

116 To answer this question, consider how Eq. (3) behaves following an extended training period. Like  
117 adapted behavior<sup>23,37,44,45</sup>, Eq. (3) approaches an asymptotic limit when the processes of learning and  
118 forgetting balance each other (Fig. 1B, implicit). In the extreme case where the implicit system responds  
119 solely to target error, total implicit learning is determined by Eqs. (1) and (3):

120 
$$x_i^{ss} = \frac{b_i}{1 - a_i + b_i} (r - x_e^{ss}) \quad (4)$$

121 Eq. (4) demonstrates a competition between implicit and explicit systems; the total amount of implicit  
122 adaptation ( $x_i^{ss}$ ) is related to the difference between the perturbation  $r$  and the total amount of explicit  
123 adaptation ( $x_e^{ss}$ ).

124 On the other extreme, when the implicit system responds solely to SPE, total implicit learning is  
125 determined by Eqs. (2) and (3):

126 
$$x_i^{ss} = \frac{b_i}{1 - a_i + b_i} r \quad (5)$$

127 Eq. (5) demonstrates an independence between implicit and explicit systems; the total amount of implicit  
128 adaptation depends solely on the rotation's magnitude, not one's explicit strategy.

129 In summary, the competition (Eq. (4)) and independence (Eq. (5)) equations make predictions that  
130 can answer a critical question: which errors drive implicit adaptation? If implicit learning is predominantly  
131 driven by SPE, the implicit system will depend only on the perturbation's magnitude according to the  
132 independence equation (Eq. (5)). On the other hand, if implicit learning is predominantly driven by target  
133 error, the implicit system will compete with explicit strategies according to the competition equation (Eq.  
134 (4)). Here, we investigate these predictions across several experimental paradigms and explore their  
135 limitations in describing the behavior of the implicit learning system.

136  
137 *Enhancement in explicit strategy reduces the amount of implicit adaptation*

138 Suppose that in one condition, participants adapt to a visual rotation with some fixed explicit strategy (Fig.  
139 1D, aim, solid magenta line). But in a second condition, the participant is coached about the

140 perturbation<sup>16,46</sup>, enhancing their explicit strategy (Fig. 1D, aim, dashed magenta line). If the implicit  
141 system learns only from SPE (Eq. (5)), then changes in explicit strategy will have no impact on implicit  
142 learning (Fig. 1D, H1, compare solid black and dashed blue implicit lines). On the other hand, if the implicit  
143 system learns only from target error, it competes with the explicit system (Eq. (4)). Coaching explicit  
144 strategy suppresses implicit learning (Fig. 1D, H2, compare dashed blue and solid black implicit lines).

145 To test this prediction, we considered an experiment performed by Neville and Cressman<sup>15</sup>.  
146 Participants were exposed to either a 20°, 40°, or 60° visuomotor rotation (Fig. 1E), and separated into  
147 instructed and non-instructed conditions. Non-instructed groups (Fig. 1E, gray) adapted without any initial  
148 instruction regarding the perturbation. Instructed participants were briefed about the upcoming rotation  
149 and how they should compensate to hit the target (Fig. 1E, yellow). This instruction sharply increased the  
150 rate of adaptation over that of the non-instructed group (Fig. 1E, compare yellow and gray curves).

151 To determine how instruction accelerated adaptation, participants were asked to reach with and  
152 without explicit strategy (Fig. S1). The marginal effects of instruction (average across rotation magnitudes)  
153 and perturbation magnitude (average over instruction conditions) are shown in Figs. 1F and 1G  
154 respectively. Unsurprisingly, instructed participants learned faster due to an enhancement in explicit re-  
155 aiming, which increased by approximately 10° across each rotation magnitude (Fig. 1F, explicit).

156 Curiously, while instruction enhanced explicit learning, it appeared to impair implicit adaptation,  
157 decreasing the total implicit aftereffect (Fig. 1F, implicit learning, data). Even more puzzling, whereas  
158 contributions of the explicit system increased with rotation magnitude (Fig. 1G, explicit), implicit learning  
159 did not, as one might intuitively expect (Fig. 1G, implicit learning, data).

160 To interpret the implicit response to awareness and perturbation magnitude, we fit both the  
161 competition (Eq. (4)) and independence equations (Eq. (5)) to the behavior across all groups, under the  
162 assumption that the implicit system's sensitivity to error and retention ( $b_i$  and  $a_i$ ) were identical across all  
163 rotation sizes, and across the instructed and non-instructed conditions.

164 The independence and competition models made contrasting predictions (see individual  
165 predictions in Figs. S1B&C). Because SPE does not depend on explicit aiming, Eq. (5) incorrectly predicted  
166 the same level of implicit learning irrespective of explicit awareness (Fig. 1F, implicit learning, indep.).  
167 Furthermore, because implicit adaptation is driven solely by the rotation magnitude in the independent  
168 model, Eq. (5) also incorrectly predicted that implicit learning should increase with rotation size (Fig. 1G,  
169 implicit learning, indep.).

170 The opposite was true of the competition model. Eq. (4) correctly predicted less implicit learning  
171 in instructed participants who used greater explicit strategy (Fig. 1F, implicit learning, competition).  
172 Remarkably, the competition model also predicted that the implicit aftereffect should remain similar  
173 across rotation magnitudes (Fig. 1G, implicit learning, competition). How was this possible? Critically, the  
174 competition equation suggests that the driving force for implicit learning is not solely the rotation, but the  
175 difference between the rotation and explicit strategy. Therefore, because the total amount of explicit re-  
176 aiming increased as the rotation magnitude increased (Fig. 1G, explicit), their difference remained roughly  
177 constant across all perturbation sizes (Fig. S1D). Thus, Eq. (4) predicted similar implicit aftereffects  
178 irrespective of rotation size.

179 In summary, when explicit learning is enhanced through instruction, implicit learning is impaired.  
180 As perturbation magnitude increases, contributions of explicit learning increases, but not the

181 contributions of implicit learning. These observations are consistent with the competition model (Eq. (4)),  
182 suggesting that the implicit and explicit systems are primarily driven by a common target error.

183

### 184 *Suppression of explicit learning increases the amount of implicit adaptation*

185 The competition equation predicts that enhancing explicit strategy should decrease implicit learning (Fig.  
186 1). What should happen when explicit learning is suppressed? Suppose participants adapt with an explicit  
187 strategy (Fig. 2B, aim, solid magenta line), but this strategy is then suppressed (Fig. 2B, aim, dashed  
188 magenta line). Because SPE learning does not depend on explicit strategy, Eq. (5) predicts no change in  
189 implicit learning (Fig. 2B, H1, left, compare solid black and dashed blue implicit lines) (Eq. (5)). However,  
190 because target errors do depend on explicit strategy, Eq. (4) predicts that suppressing explicit aiming will  
191 increase implicit learning (Fig. 2B, H2, right, compare dashed blue and solid black implicit lines).

192 One way to suppress explicit learning is to make participants unaware by introducing the  
193 perturbation gradually. In an earlier experiment, Saijo and Gomi (2010)<sup>42</sup> exposed participants to either  
194 an abrupt (Fig. 2A, abrupt) or gradual (Fig. 2A, gradual) perturbation. The abrupt perturbation was  
195 immediately set to 60°, but the gradual perturbation reached this magnitude over time.

196 Participants in the abrupt condition adapted rapidly to the perturbation, greatly decreasing their  
197 target error to about 5° over about 10 perturbation cycles (Fig. 2C, abrupt). Participants in the gradual  
198 group, experienced small target errors throughout training, but adapted less by the end of the rotation  
199 period, exhibiting a terminal error nearly 3 times greater than the abrupt condition (Fig. 2C, gradual).

200 At this point, the perturbation was abruptly removed, revealing large aftereffects in each group.  
201 However, even though participants in the gradual group had adapted less completely to the rotation, they  
202 paradoxically exhibited larger aftereffects (Fig. 2F, data), which remained elevated throughout the entire  
203 washout period (Fig. 2C, aftereffect). If these aftereffects reveal the total amount of implicit adaptation,  
204 given that strategies are rapidly disengaged when the perturbation is removed<sup>34</sup> (Fig. S2), how could more  
205 complete adaptation in the abrupt group lead to less implicit adaptation?

206 To investigate this phenomenon, we considered how implicit and explicit systems might behave  
207 according to the independence (Eq. (5)) and competition (Eq. (4)) frameworks. To simulate these models,  
208 we estimated the explicit strategies in each group. Neville and Cressman<sup>15</sup> had measured the explicit  
209 response to a 60° rotation, demonstrating that participants re-aimed their hand approximately 35°  
210 consistently over the adaptation period (see yellow points in Figs. 2D&E, explicit aim). This estimate  
211 agreed well with the data; participants in the abrupt condition adapted 55°, and exhibited an aftereffect  
212 of approximately 20° (Fig. 2F, data, abrupt), suggesting about 35° of re-aiming. In the gradual group, we  
213 assumed that little to no re-aiming occurred. This also seemed consistent with the data; participants in  
214 the gradual group adapted approximately 40°, and exhibited an aftereffect of approximately 38° (Fig. 2F,  
215 data, gradual) suggesting <5° of re-aiming. Using these estimates, we constructed hypothetical explicit  
216 learning timecourses, as shown in Figs. 2D&E, explicit aim).

217 We next used the state-space model to simulate the implicit learning timecourse, in cases where  
218 the implicit system learned solely due to SPE (Fig. 2D, implicit angle) or solely due to target error (Fig. 2E,  
219 implicit angle), under the assumption that participants in both the abrupt and gradual groups had the  
220 same implicit error sensitivity ( $b_i$ ) and retention factor ( $a_i$ ). The parameter sets that yielded the closest  
221 match to the measured behavior (Fig. 2C) are shown in Figs. 2D&E (directional error). In both cases, the  
222 models predicted abrupt and gradual learning timecourses that resembled the data.

223           However, the implicit states predicted by SPE learning and target error learning possessed a  
224 critical difference. According to Eq. (4), the target error model predicted that the total extent of implicit  
225 learning would be suppressed by explicit strategy in the abrupt condition, yielding a smaller aftereffect  
226 (Fig. 2E, implicit angle). However, according to Eq. (5), the SPE model predicted that implicit learning  
227 should reach the same level, yielding identical aftereffects (Fig. 2D, implicit angle).

228           In summary, the differences in aftereffects across the abrupt and gradual conditions (Fig. 2F, data)  
229 were accurately predicted by the competition model (Fig. 2F, competition), but not the independence  
230 model (Fig. 2F, indep.). Suppressing the explicit strategy revealed competition between implicit and  
231 explicit systems which suggested that the implicit system predominantly responded to target error.

232

### 233 *Subject-to-subject correlations reveal competition between implicit and explicit systems*

234 Data in Figs. 1 and 2 suggested that the implicit system was altered by competition with explicit strategy.  
235 Is this competition observed at the level of individual participants? In other words, the competition model  
236 would predict that participants who use larger strategies will naturally exhibit less implicit adaptation.

237           To investigate this possibility, we considered earlier work where Fernandez-Ruiz and colleagues<sup>41</sup>  
238 exposed participants to a 60° rotation (Fig. 3A). The large rotation appeared to induce substantial variation  
239 in strategic re-aiming. Consider for example Subjects A and B (Figs. 3B&C). Upon rotation onset, Subject  
240 A rapidly reduced their directional error (Fig. 3B, Subject A) and exhibited two characteristics that  
241 suggested the use of large explicit re-aiming angles: (1) their reach angle varied greatly from one cycle to  
242 the next<sup>14,44,47</sup> and (2) their movement preparation time (Fig. 3C, Subject A) greatly increased upon onset  
243 of the perturbation<sup>18,28,37,47</sup>. On the other hand, Subject B reduced directional errors slowly and  
244 consistently (Fig. 3B, Subject B), with little to no increase in movement preparation time (Fig. 3C, Subject  
245 B). Thus, Subjects A and B appeared to engage explicit strategies to differing extents. How did differences  
246 in their explicit strategy impact implicit learning?

247           When the perturbation was removed, reaction time returned to baseline levels (Fig. 3C), revealing  
248 each participant's aftereffect (Fig. 3B, aftereffect). Paradoxically, though Subject A adapted more  
249 completely to the rotation during the adaptation period, they exhibited a far smaller aftereffect (Fig. 3B).  
250 A possible explanation is that because Subject A used greater explicit strategy during adaptation, their  
251 implicit system adapted less due to competition, producing a smaller aftereffect. Indeed, although  
252 participants who increased their preparation time exhibited smaller reach errors (Fig. S3), engaging  
253 explicit strategies appeared to inhibit their implicit system, as revealed by a decrease in the aftereffect  
254 during the washout period (Fig. 3D;  $\rho=0.87$ ,  $p<0.01$ ).

255           The competition model (Eq. (4)) provides a way to quantify these subject-to-subject correlations.  
256 The left-most term in this equation is a learning gain that varies between 0 and 1, which depends on  
257 implicit learning properties: retention ( $a_i$ ) and error sensitivity ( $b_i$ ). Thus, the competition equation  
258 predicts that implicit and explicit learning will negatively co-vary according to a line whose slope and bias  
259 are determined by the properties of the implicit learning system ( $a_i$  and  $b_i$ ). To test the model's accuracy,  
260 we exposed participants to a 30° visuomotor rotation (Fig. 3E) under two conditions (Experiment 1). In  
261 one group, we strictly limited preparation time to inhibit time-consuming explicit strategies<sup>41,47</sup> (Fig. 3F,  
262 Limit PT). In the other group, we imposed no preparation time constraints (Fig. 3F, No PT limit). Our goal  
263 was to measure  $a_i$  and  $b_i$  in the Limit PT group which putatively relied on implicit learning, and use these  
264 values to predict the implicit-explicit relationship across No PT limit participants.

265 As expected, PT Limit participants dramatically reduced their reach latencies throughout the  
266 adaptation period, whereas No PT limit participants exhibited a sharp increase in movement preparation  
267 time after perturbation onset (Fig. 3G), indicating explicit re-aiming<sup>18,28,37,41,47</sup>. Consistent with suppression  
268 of explicit strategy, learning proceeded more slowly and was less complete with the PT Limit (Fig. 3F; two-  
269 sample t-test on last 10 adaptation epochs:  $t(30)=2.14$ ,  $p=0.041$ ,  $d=0.77$ ).

270 Next, we empirically measured the putative implicit retention factor ( $a_i$ ) and error sensitivity ( $b_i$ )  
271 associated with the PT Limit learning curve. We measured the retention factor during a terminal “no  
272 feedback” period (Fig. 3F, dark gray, no feedback) and error sensitivity ( $b_i$ ) during the adaptation period  
273 (see Methods). Together, this retention factor ( $a_i=0.943$ ) and error sensitivity ( $b_i=0.35$ ), produced a  
274 specific form of Eq. (4), namely,  $x_i = 0.86(30 - x_e)$ , which we could use to predict how implicit and explicit  
275 learning should vary across participants in the No PT limit group (Fig. 3H, blue line).

276 To measure No PT limit implicit and explicit learning we instructed participants to move their hand  
277 through the target without any re-aiming at the end of the adaptation period (Fig. 3F, no aiming). The  
278 precipitous change in reach angle revealed the terminal amounts of implicit and explicit adaptation (post-  
279 instruction reveals implicit; total drop reveals explicit). To verify the accuracy of this explicit measure, we  
280 asked participants to verbally report their re-aiming angles (see Methods). Participants that demonstrated  
281 greater explicit strategy indeed reported larger re-aiming angles at the end of adaptation (Fig. S4A,  
282  $\rho=0.709$ ) and also appeared to require greater movement preparation time (Fig. S4B,  $\rho=0.708$ ).

283 How did subject-to-subject variations in implicit and explicit learning compare to the model’s  
284 prediction? We observed a striking correspondence between the No PT limit implicit-explicit relationship  
285 (Fig. 1H, black dot for each participant;  $\rho=-0.95$ ) and that predicted by the competition model (Fig. 3H,  
286 blue). The slope and intercept predicted by Eq. (4) (-0.86 and 25.74°, respectively) differed from the  
287 measured linear regression (Fig. 1H, black line,  $R^2=0.91$ ; slope = -0.9 with 95% CI [-1.16, -0.65] and  
288 intercept = 25.46° with 95% CI [22.54°, 28.38°]) by only about 5% and 1%, respectively.

289 Lastly, we tested two alternate explanations that could also explain the observed correlations  
290 between implicit and explicit learning. First, explicit (total adaptation minus no aiming probe) and implicit  
291 (no aiming probe) learning measures inherently share variance which could lead to spurious correlation.  
292 Second, in the event that participants exhibit nearly identical learning asymptotes, say approximately 26°  
293 in our experiment, these implicit and explicit learning measures could be trivially constrained to lie along  
294 the regression line:  $x_i + x_e \approx C$ , where  $C = 26^\circ$ .

295 To test these possibilities, we conducted a control experiment (Experiment 2). Participants  
296 adapted to a 30° rotation again (Fig. 3I), but this time, we measured implicit adaptation using the no-  
297 aiming instruction over an extended 20-cycle period (Fig. 3J, no aiming). We calculated early (first no-  
298 aiming cycle; Fig. 3J, measure early implicit) and late (last 15 no-aiming cycles; Fig. 3J, measure late  
299 implicit) implicit learning measures. As in Fig. 3H, we calculated total explicit strategy as the difference  
300 between total adaptation and the first no-aiming cycle (Fig. 3J, measure explicit).

301 Critically, our explicit measure and late implicit measure were now properly decoupled, as they  
302 depended on separate cycles. Remarkably, late implicit learning exhibited patterns that matched the  
303 group-level interventions observed by Neville and Cressman<sup>15</sup> (Fig. 1) and Saijo and Gomi<sup>42</sup> (Fig. 2).  
304 Namely, participants that compensated most for the perturbation utilized large explicit strategies (Fig. 3K;  
305  $\rho=0.79$ ,  $p<0.001$ ). But enhancements in overall learning came at the cost of reductions in implicit



306 adaptation (Fig. 3L;  $\rho=-0.68$ ,  $p=0.003$ ), due to a competition between implicit and explicit learning (Fig.  
307 3M,  $\rho=-0.79$ ,  $p<0.001$ ).

308 Secondly, we considered the relationship between explicit strategy and early implicit learning,  
309 and again observed a strong negative linear relationship (Fig. 3L,  $\rho=-0.79$ ):  $x_i + 0.6x_e = 19.1$ . Notably, the  
310 explicit regression coefficient's (0.6) 95% CI, [0.42,0.77] did not contain 1. Equivalently, this indicates that  
311 there was substantial variation in asymptotic learning across participants (range 16-29°), ruling out the  
312 trivial possibility that  $x_i + x_e = C$ , described above. To the contrary, participants who showed greater explicit  
313 learning had better overall compensation for the perturbation, but had less implicit learning.

314 In summary, consistent with the idea that the two learning systems share a common error, we  
315 found that when a subject's performance depends more on the contributions of the explicit system, their  
316 implicit system learns less.

317

### 318 *Competition predicts increases in both implicit and explicit error sensitivity during savings*

319 When participants are exposed to the same perturbation twice, they adapt more quickly the second time.  
320 This phenomenon is known as savings and is a hallmark of sensorimotor adaptation<sup>9,48,49</sup>. Multiple studies  
321 have attributed this process solely to changes in explicit strategy<sup>28,33,34,36,50</sup>.

322 For example, in an earlier work<sup>28</sup>, we trained participants ( $n=14$ ) to reach to one of two targets,  
323 coincident with an audio tone (Fig. 4A). By shifting the displayed target approximately 300 ms prior to  
324 tone onset on a minority of trials (20%), we forced participants to execute movements with limited  
325 preparation time (Low preparation time; Fig. 4A, middle). On trials in which subjects had high preparation  
326 time, i.e. trials without a target switch (Fig. 4B, left), adaptation exhibited savings; the rate of learning  
327 increased across exposures (Fig. 4B, right, High PT; Wilcoxon signed rank,  $p=0.0085$ , Cohen's  $d=0.683$ ).  
328 Learning differences were most pronounced on the first 40 trials after perturbation onset (Fig. 4C, left;  
329 Fig. 4C, right, paired t-test,  $p=0.0044$ , Cohen's  $d=0.920$ ).

330 To test for changes in implicit learning, we focused on short PT trials where explicit strategy is  
331 suppressed<sup>41,47</sup>. Unlike the High PT trials, adaptation expressed on short PT trials was similar during the  
332 two exposures (Fig. 4B, middle); we found no difference in the rate of short PT learning (Fig. 4B, right,  
333 Wilcoxon signed rank,  $p=0.903$ ). Similarly, the difference in learning curves for exposures 1 and 2 (Fig. 4C,  
334 middle) did not show any change after perturbation onset (Fig. 4C, right, Low PT, paired t-test,  $p=0.624$ ).

335 These results suggested that savings relied solely on a time-consuming explicit strategy. Does this  
336 mean that implicit learning was completely unaltered by prior exposure to the perturbation? The answer  
337 depends on which errors drive implicit adaptation.

338 In the competition model, implicit learning is driven by target errors (Eq. (1)) that are also shared  
339 with the explicit system. We fit this model to the behavior of each participant under the assumption that  
340 the reach angle on low preparation time trials revealed the implicit state of adaptation, and the reach  
341 angle on high preparation time trials revealed the sum of the implicit and explicit states of adaptation.  
342 The model generated implicit (Fig. 4D, left and middle, blue) and explicit (Fig. 4D, left and middle,  
343 magenta) states that tracked the behavior well in high PT trials (Fig. 4D, left and middle, solid black line)  
344 as well as low PT trials (Fig. 4D, left and middle, dashed black line).

345 Unsurprisingly, given that High PT trials exhibited savings but Low PT trials did not, the model  
346 predicted that explicit error sensitivity increased across exposures, thus leading to an increased rate of  
347 adaptation (Fig. 4D, right, explicit; paired t-test,  $p=0.016$ , Cohen's  $d=0.738$ ). However, the model

348 unmasked a surprising possibility; even though the implicit system showed no increase in learning rate on  
349 Low PT trials (Figs. 4B&C, right), the model still indicated that the implicit system had increased its error  
350 sensitivity across exposures (Fig. 4D, right, implicit, paired t-test,  $p=0.023$ , Cohen's  $d=0.686$ ).

351 In contrast, when we fit the same data assuming that implicit adaptation was driven by SPE rather  
352 than target error (Eq. (2), learning depends on rotation but not explicit strategy), the model (not shown  
353 in Fig. 4) predicted that only explicit (paired t-test,  $p=0.026$ , Cohen's  $d=0.673$ ) but not implicit (paired t-  
354 test,  $p=0.099$ ) error sensitivity had increased.

355 In summary, when we reanalyzed our earlier data, Eqs. (4) and (5) suggested that the same data  
356 could be interpreted in two different ways. If we assumed that implicit learning is independent of explicit  
357 strategy (independence equation), then only explicit strategy contributed to savings. This is in fact what  
358 we had concluded in our original report. However, if we assumed that the implicit and explicit systems  
359 learned from the same error (competition equation), then both implicit and explicit systems contributed  
360 to savings. How can we determine which interpretation is more parsimonious with measured behavior?  
361

### 362 *Competition with explicit strategy can alter measurement of implicit learning*

363 Suppose you arrive at your family dinner, but on this occasion are feeling particularly famished. Yet after  
364 the meal, you are surprised to find that you ate the same amount as last week despite feeling hungrier.  
365 Does this mean your hunger level was actually the same? No, not necessarily; because you are sharing the  
366 meal with others, changes in their consumption rates alter the food available to you. So, eating the same  
367 amount could mean that your sister sitting next to you was also hungrier than usual, taking more than  
368 their normal share, and thus leaving less for you.

369 The competition equation (Eq. (4)) presents an analogous scenario, except here the “family” in  
370 question is the implicit and explicit adaptive states, and the “food” that is available for consumption is  
371 error. The competition model provides the insight that when the explicit system learns faster than before  
372 (Fig. 4D, Day 2 vs. Day 1), it leaves less error to drive implicit learning. However, despite this reduced error  
373 for the implicit system, performance on Low PT trials on Day 2 was comparable to Day 1 (Fig. 4B, right).  
374 Thus, error sensitivity of the implicit system must also have increased from Day 1 to Day 2.

375 To understand how our ability to detect changes in implicit adaptation can be altered by explicit  
376 strategy we constructed a competition map (Fig. 5A). Imagine that we want to compare behavior across  
377 two timepoints or conditions. Fig. 5A shows how change in implicit error sensitivity (x-axis) and explicit  
378 error sensitivity (y-axis) both contribute to measured implicit aftereffects (denoted by map colors), based  
379 on the competition equation (Eq. (4)). The left region of the map (cooler colors) denotes combinations of  
380 implicit and explicit changes that decrease implicit adaptation. The right region of the map (hotter colors)  
381 denotes combinations that increase implicit adaptation. The middle black region represents combinations  
382 that manifest as a perceived invariance in implicit adaptation (<5% absolute change in implicit adaptation).

383 Practically, this map defines several distinct regions (Fig. 5B). In Region A, there is a “true  
384 decrease” in implicit adaptation; that is, implicit error sensitivity decreases between Timepoints 1 and 2  
385 as does the total amount of implicit learning. Region D is similar, but for simultaneous increases in implicit  
386 error sensitivity and total implicit learning (“true increase”).

387 The other regions describe more surprising situations. In Region B, there is only a “perceived  
388 decrease” in implicit learning; that is, implicit learning decreases, even though the implicit error sensitivity

389 has actually increased or remained the same. In Region E, there is only a “perceived increase” in implicit  
390 learning; implicit learning increases, even though its error sensitivity decreased or remained the same.

391 Indeed, we have already explored these phenomena in Figs. 1 and 2. In Fig. 1, enhancing explicit  
392 strategy decreased implicit learning without changing any implicit learning properties. The scenario is  
393 equivalent to moving up the y-axis of the map (Fig. 5C, top). The same implicit system will decrease its  
394 output (Fig. 5C, bottom) when normal levels of explicit strategy are increased (Fig. 5C, middle). On the  
395 other hand, suppressing explicit strategy by gradually changing the perturbation appeared to increase  
396 implicit learning without changing any implicit learning properties (Fig. 2). This scenario is equivalent to  
397 moving down the y-axis of the map (Fig. 5D, top). The same implicit system will increase its output (Fig.  
398 5D, bottom) when normal levels of explicit strategy are then suppressed (Fig. 5D, middle).

399 Now, let us consider the savings task in Fig. 4. The target error-driven (Eq. (1)) state space model  
400 predicted (Fig. 3D) that explicit error sensitivity increased by approximately 70.6% during the second  
401 exposure, whereas the implicit system’s error sensitivity increased by approximately 41.5% (Fig. 5E,  
402 middle). These changes in implicit and explicit adaptation describe a single point in the competition map,  
403 denoted by the gray circle in Fig. 5E (top). This experiment occupies Region C, which indicates that despite  
404 the 41.5% increase in implicit error sensitivity, the total amount of implicit learning will increase by less  
405 than 5% (Fig. 5E, bottom). In other words, the competition equation suggests the possibility that savings  
406 could have occurred in the implicit system but was hidden by a dramatic increase in explicit strategy.

407 To test this prediction, we can suppress explicit adaptation, thus eliminating competition (Fig. 5F,  
408 middle). Such an intervention would move our experiment from Region C to Region D (Fig. 5F, top) where  
409 we will observe greater change in the implicit process (Fig. 5D, bottom). Thus, we performed a new  
410 experiment to test this prediction.

411

#### 412 *Savings in implicit learning is unmasked by suppression of explicit strategy*

413 The key prediction is that removal of explicit strategy will unmask savings in implicit learning (Fig. 5F). We  
414 exposed participants (Experiment 3) to two 30° rotations, separated by an intervening period of washout.  
415 To suppress explicit strategy, we forced participants to move under strict reaction time constraints on  
416 every trial. As a result, participants reached to each of the four targets with a latency of approximately  
417 200 ms (Fig. 6B, top), nearly 100 ms sooner than the Low PT condition used in our earlier experiment<sup>28</sup>  
418 (Fig. 6A). When reaction time was limited on all trials, the learning rate during the second exposure (Fig.  
419 6B, middle) exhibited a marked increase (Fig. 6C, no comp.; Wilcoxon signed rank,  $p=0.014$ , Cohen’s  
420  $d=0.637$ ). This enhancement in learning developed immediately after perturbation onset (Fig. 6B, bottom;  
421 Fig. 6C, bottom, no comp., paired t-test,  $p=0.008$ , Cohen’s  $d=1.06$ ).

422 In summary, when explicit learning was suppressed, Low PT behavior exhibited savings (Fig. 6B).  
423 But when explicit strategies remained active, Low PT behavior did not exhibit any change in learning rate  
424 (Fig. 6A). One possible explanation for these observations is that an implicit system expressible at Low PT  
425 exhibits savings, but this can be masked by competition with explicit strategy.

426

#### 427 *Impairments in implicit learning lead to anterograde interference*

428 When two opposing perturbations (say *A* and *B*) are experienced in sequence, exposure to perturbation  
429 *A* decreases the rate of learning in *B* (anterograde interference). Like savings<sup>29,32,48,49</sup>, we recently

430 suggested that impaired learning in *B* is caused by a change in error sensitivity<sup>26</sup>. Might this change in  
431 error sensitivity depend on the implicit learning system?

432 We exposed two groups of participants to opposing visuomotor rotations of 30° and -30° in  
433 sequence (Experiment 4). In one group, the perturbations were separated by a 5-minute break (Fig. 7A).  
434 In a second group, the break was 24 hours in duration (Fig. 7B). We suppressed explicit strategies by  
435 strictly limiting reaction time. Under these constraints, participants executed movements at latencies  
436 slightly greater than 200 ms (Figs. 7A&B, middle, blue). These reaction times were approximately 50%  
437 lower than those observed when no reaction time constraints were imposed on participants, as in Lerner  
438 & Albert et al.<sup>26</sup> (Figs. 7A&B, middle, green).

439 We found that implicit adaptation during the second rotation period was significantly impaired  
440 after a 5-minute break (Fig. 7A, bottom). The rate of implicit learning decreased by approximately 75%  
441 (Fig. 7C, 5min, limit). Passage of time partially improved this deficit (Fig. 7B, bottom). When the rotations  
442 were separated by a 24 hr break, implicit learning rate was impaired by only 55% (Fig. 7C, 24 hr, limit).

443 Thus, we can conclude that suppression of explicit strategy revealed an anterograde deficit in  
444 implicit learning that did not completely resolve after 24 hours, perhaps even stronger than that observed  
445 when no reaction time constraints are imposed<sup>26</sup> (Fig. 7C, Lerner et al. (2020), no limit; see Discussion).

446

447 *The implicit system may adapt to multiple target errors at the same time*

448 The idea that a single shared error drives both implicit and explicit learning is quite surprising. After all, in  
449 earlier work by Mazzoni and Krakauer<sup>12</sup>, it appeared that implicit learning was driven by outcome-  
450 independent prediction errors (Eq. (2)) that were unaltered by explicit strategy. Yet, in Figs. 1-7, implicit  
451 learning clearly depended, at least in part, on target error, and exhibited clear interactions with explicit  
452 strategy. How does one reconcile the current results with the results of Mazzoni and Krakauer?

453 To explore this question, we revisited these earlier experiments. In Mazzoni and Krakauer, we  
454 tested two sets of participants. In the no-strategy group, participants adapted to a standard 45° rotation  
455 (Fig. 8A, blue, no-strategy, adaptation) followed by washout (Fig. 8A, blue, no-strategy, washout). In a  
456 second group, participants made two initial movements with the rotation (Fig. 8A, red, strategy, 2  
457 movements no instruction). Then we told participants to aim towards a neighboring target (45° away)  
458 which entirely compensated for the rotation. Unlike the experiments described in Figs. 1-7, in which only  
459 the primary target was visible, in Mazzoni and Krakauer both the primary target and the aiming target  
460 were always visible. Participants immediately adopted the aiming strategy, bringing error with respect to  
461 the primary target to zero (Fig. 8A, red, strategy, instruction). Surprisingly, after eliminating this error,  
462 their movement angles gradually drifted beyond the primary target, overcompensating for the rotation.  
463 These involuntary changes implicated an implicit process.

464 When we compared the rate of learning with and without strategy, we found that it was not  
465 different over the initial exposure to the perturbation (Fig. 8B, gray, compare learning rates; compare  
466 mean adaptation over first 24 movements, two-sample t-test,  $p=0.223$ ). This suggested that implicit  
467 adaptation was unaltered by the abrupt change in explicit strategy, and equally importantly, was not  
468 driven by error between the cursor and target (Eq. (1)), but rather by a sensory prediction error (Eq. (2)).

469 However, there remained an unsolved puzzle. While the initial rates of adaptation were the same  
470 irrespective of strategy, adaptation diverged later in learning (Fig. 8B, compare strategy and no-strategy  
471 curves after the initial gray region; two-sample t-test,  $p<0.005$ ), with the no-strategy group achieving

472 greater implicit learning (see aftereffect in Fig. 8C; two-sample t-test,  $p < 0.005$ ). Might these late  
473 differences have been caused by participants in the strategy group abandoning the explicit strategy as it  
474 led to larger and larger errors? This possibility seemed unlikely. When we asked participants to stop re-  
475 aiming (Fig. 8A, do not aim rotation on) their movement angle changed by  $47.8^\circ$  (difference between 3  
476 movements before and 3 movements after instruction), indicating that they had continued to maintain  
477 the instructed explicit re-aiming strategy near  $45^\circ$ .

478 We wondered if interactions between implicit and explicit learning could help solve these puzzles.  
479 First, we considered the competition model that best described the experiments in Figs. 1-7. In this model,  
480 the implicit system is driven exclusively by error with respect to the primary target (Eq. (1)), which is  
481 shared with explicit strategy (Fig. 8D, top,  $e_1$ ). While this model predicted learning in the standard no-  
482 strategy condition, it failed to account for the drift observed when participants were given an explicit  
483 strategy (Fig. 8D, no learning in strategy group). This was not surprising. If implicit learning is driven by the  
484 primary target's error, it will not adapt in the strategy group because participants explicitly reduce target  
485 error to zero at the start of adaptation (note that  $-45^\circ$  in Fig. 8D actually means a  $0^\circ$  primary target error).

486 We next considered the possibility that implicit learning was driven exclusively by error with  
487 respect to the aimed target (target 2, Fig. 8E, top,  $e_2$ ), as we concluded in our original study<sup>12</sup>. While this  
488 model correctly predicted implicit learning in both the no-strategy and strategy conditions, it could not  
489 account for any differences in learning that emerged later during the adaptation period (Fig. 8E, bottom).

490 Finally, we noted that participants in the strategy group were given two contrasting goals. One  
491 goal was to aim for the secondary target, whereas the other goal was to move the cursor through the  
492 primary target (both targets were always visible). Therefore, we wondered if participants in the strategy  
493 group learned from two distinct errors: cursor with respect to target 1, and cursor with respect to target  
494 2 (Fig. 8F, top). In contrast, participants in the no-strategy group attended solely to the primary target,  
495 and thus learned only from the error between the cursor and target 1. Thus, we imagined that implicit  
496 learning in the strategy group was driven by the two different kinds of target error:

$$\begin{aligned} 497 \quad x_{i,1}^{(n+1)} &= a_i x_{i,1}^{(n)} + b_i e_1^{(n)} \\ x_{i,2}^{(n+1)} &= a_i x_{i,2}^{(n)} + b_i e_2^{(n)} \end{aligned} \quad (6)$$

498 These two modules then combined to determine the total amount of implicit learning (i.e.,  $x_i = x_{i,1} + x_{i,2}$ ).

499 Remarkably, when we applied the dual target error model (Eq. (6)) to the strategy group, and the  
500 single target error model (Eqs. (1) & (3)) to the no-strategy group, the same implicit learning parameters  
501 ( $a_i$  and  $b_i$ ) closely tracked the observed group behaviors (black model in Fig. 8B). These models correctly  
502 predicted that initial learning would be similar across the strategy and no-strategy groups (compare curves  
503 in gray region in Fig. 8F bottom), but would diverge later during adaptation. How was this possible?

504 In Fig. 8G (left), we show how the errors with respect to the primary target and the aiming target  
505 evolve as a function of time for the dual target model. Due to the instructed strategy, primary target error  
506 is reduced to zero at the start of adaptation (see Fig. 8G, original target error curve). Therefore, early in  
507 learning, the implicit system is driven predominantly only by one error source in both the strategy and no-  
508 strategy groups, leading to similar adaptation rates. However, as the error with respect to the aimed  
509 target decreases, error with respect to the primary target increases but in the opposite direction (Fig. 8G;  
510 see schematic in Fig. 8F for intuition). Therefore, the primary target error opposes further adaptation to

511 the aiming target error. This counteracting force causes implicit adaptation to saturate prematurely.  
512 Hence, participants in the no-strategy group, who do not experience this error conflict, adapt more.

513 This re-analysis suggests that when people move a cursor to one visual target (Objective 1), while  
514 aiming at another visual target (Objective 2), each target appears to contribute a separate implicit error  
515 source. When these two error sources conflict with one another, the implicit learning system can exhibit  
516 an unintuitive attenuation in the total amount of adaptation. Thus, while explicit strategies can suppress  
517 implicit learning via competition (Figs. 1-7), a different type of suppression can occur when parallel implicit  
518 learning systems attempt to solve two conflicting objectives, as in Fig. 1B.

519

#### 520 *The persistence of sensory prediction error, in the absence of target error*

521 Our re-analysis in Figs. 8A-G, suggested that when participants use a second target to aim their reach, this  
522 additional landmark creates a second implicit error source. To what extent does this error depend on the  
523 target's physical presence in the workspace? Taylor & Ivry<sup>21</sup> tested this idea, repeating the instruction  
524 paradigm used by Mazzoni and Krakauer, though with nearly 4 times the number of adaptation trials (Fig.  
525 8H, instruction with target, black). Interestingly, while the reach angle exhibited the same implicit drift  
526 described by Mazzoni and Krakauer, with many more trials participants eventually counteracted this drift  
527 by modifying their explicit strategies, bringing their target error back to zero (Fig. 8H, black). At the end of  
528 adaptation, participants exhibited large implicit aftereffects after being instructed to no longer aim (Fig.  
529 8H, right, aftereffect;  $t(9)=5.16$ ,  $p<0.001$ , Cohen's  $d=1.63$ ).

530 However, in a second experiment, participants were taught how to re-aim their reach angles  
531 during an initial baseline period, but during adaptation itself, they were not provided with physical aiming  
532 targets (Fig. 8H, instruction without target). Thus, in this case, only an SPE could drive implicit adaptation  
533 towards the aimed location. Even without physical aiming landmarks, participants immediately eliminated  
534 error at the primary target after being instructed to re-aim (Fig. 8H, middle, yellow). Remarkably however,  
535 without the physical aiming target, these participants did not exhibit an implicit drift in reach angle at any  
536 point during the adaptation period, and exhibited only a small implicit aftereffect during the washout  
537 period (Fig. 8H, right,  $t(9)=3.11$ ,  $p=0.012$ , Cohen's  $d=0.985$ ). In fact, the aftereffect was approximately 3  
538 times larger when participants aimed towards a physical target during adaptation than when this target  
539 was absent (Fig. 8H, right, aftereffect; two-sample t-test,  $t(18)=2.85$ ,  $p=0.012$ , Cohen's  $d=0.935$ ).

540 Thus, these data suggested a remarkable depth to the implicit system's response to error. While  
541 implicit adaptation was greatest in response to a target error, removal of the physical target still resulted  
542 in what appeared to be SPE-driven learning, albeit to a smaller degree.

543

#### 544 **Discussion**

545 Sensorimotor adaptation benefits from learning in two parallel systems: one that has access to explicit  
546 knowledge<sup>11,51</sup>, and another that relies on implicit, unconscious correction<sup>12,13,45</sup>. Here we show that each  
547 system is responsive to task-related errors between the subject's cursor and the target<sup>17,23</sup>. In such cases,  
548 when the error is shared competition occurs between these systems, such that when the explicit system  
549 increases its response, errors are more rapidly depleted, thus decreasing the driving force for implicit  
550 adaptation as in Fig. 1A. This model suggests that an explicit strategy can potentially mask changes in  
551 implicit error sensitivity (Fig. 4). Indeed, suppressing the explicit strategy unveiled strong increases (Fig.

552 6) and decreases (Fig. 7) in putative implicit adaptation that were consistent with two hallmarks of  
553 learning: savings and interference.

554 However, in various cases, this task error could not explain implicit adaptation by itself. For  
555 example, when participants aimed their hand to one visual target, but the cursor to another visual target,  
556 the implicit system appeared to balance two errors (Fig. 8): an error with respect to the primary target,  
557 and an error with respect to the aimed target, an SPE. These two errors were coupled together such that  
558 decreases in error with respect to the aimed target would increase error with respect to the primary  
559 target. Thus, the data suggested a second way that the implicit system can exhibit competition: two  
560 separate implicit learning modules can interfere with one another when they try to solve conflicting  
561 objectives (Fig. 1B).

562 Describing sensorimotor adaptation in terms of explicit and implicit contributions is important  
563 because these systems may rely on different neural structures. Explicit learning mechanisms are likely  
564 dependent on cortical involvement<sup>43,52,53</sup>, whereas implicit learning mechanisms at least partly engage the  
565 cerebellum<sup>7,20,54–58</sup>. Our results suggest that in some learning contexts, these two systems can compete  
566 with each other, as they strive to respond to a common error.

567

#### 568 *Flexibility in the implicit response to error and the properties of savings and interference*

569 When two similar sensorimotor perturbations are experienced in sequence, the rate of relearning is  
570 enhanced during the second exposure<sup>28,29,32,49,59</sup>. This hallmark of memory<sup>60,61</sup> is referred to as savings.  
571 Savings is often quantified based on differences in the learning curves for each exposure<sup>28,34</sup>, or the rate  
572 of adaptation<sup>62</sup>. While these conventions are intuitive, they are based on an important underlying  
573 assumption: when one learning component's properties change, its contribution to overall adaptation will  
574 also change. Here we describe why this intuition may not always be true.

575 The state space model<sup>9,39,40</sup> quantifies behavior using two processes: learning and forgetting. This  
576 model describes savings as a change in one's sensitivity to error<sup>29,32,48</sup>. When similar errors are experienced  
577 on consecutive trials, the brain becomes more sensitive to their occurrence and responds more strongly  
578 on subsequent trials<sup>37,48,63</sup>. Generally, as error sensitivity increases, so too does the rate at which we adapt  
579 to the perturbation (e.g., High PT trials in Fig. 4). However, under certain circumstances, changes in one's  
580 implicit sensitivity to error may not lead to differences in measured behavior (e.g., Low PT trials in Fig. 4).

581 The reason is competition. If implicit systems adapt to target errors (Eq. (1)), they are altered not  
582 solely by the rotation but also explicit strategy. When strategy is enhanced, it reduces the error available  
583 for implicit learning. Therefore, although the implicit system may become more sensitive to error, this  
584 increase in sensitivity is canceled out by the decrease in error size. If true, this would mean that implicit  
585 processes can change in ways that are hidden within measured behavior.

586 For example, recent lines of evidence have suggested that increases in learning rate depend solely  
587 on the explicit recall of past actions. Implicit adaptation does not seem to contribute to faster re-learning,  
588 whether its magnitude is measured through verbal reports<sup>34</sup>, or by restricting movement preparation  
589 time<sup>28,33</sup> (Fig. 4). These data might suggest that the implicit system is unaltered by past experience.  
590 However, when reaction time is limited during both exposures, thus suppressing explicit contributions to  
591 behavior, we found that the implicit system exhibited savings (Fig. 6). This would be consistent with recent  
592 evidence that savings requires the presence of task-related errors<sup>17</sup>, which can be siphoned away by the  
593 explicit system. Thus, what appears to be a disconnect between studies that have detected increases in

594 only the explicit learning rate<sup>28,33–36</sup>, and studies that have detected increases in the implicit learning  
595 rate<sup>17,37,38</sup>, may actually be consistently described by the competition equation (Eq. (4)).

596 This competition equation can be used to construct a map that describes how implicit adaptation  
597 should change based on the properties of implicit and explicit systems. When both implicit and explicit  
598 systems become more sensitive to error, the explicit response can hide changes in the implicit response  
599 (Fig. 5B, Region C). In fact, drastic enhancement in explicit adaptation could even lead to a decrease in  
600 implicit learning, even when implicit error sensitivity has increased (Fig. 5B, Region B). Indeed this  
601 prediction might explain cases whereby re-exposure to a rotation increases explicit strategies, but appears  
602 to attenuate implicit learning<sup>33,36,64</sup>. For example, a recent study by Huberdeau and colleagues<sup>33</sup>, seven  
603 exposures to a rotation led to caching of the explicit strategy, with a simultaneous decrease in the implicit  
604 aftereffect. However, such a mechanism cannot account for decreases in implicit learning seen in  
605 response to invariant error-clamp perturbations<sup>36</sup>, which presumably are free of explicit strategy.

606 Recent studies have shown that with multiple exposures to a visuomotor rotation, the explicit  
607 response to the perturbation can be cached and expressed at lower reaction times<sup>33,47</sup>. Could caching of  
608 an explicit strategy have contributed to the savings we measured under reaction time constraints in  
609 Experiment 3 (Fig. 6)? This possibility seems unlikely. First, there appears to be little such caching after  
610 only two exposures to a rotation. Otherwise, Haith and colleagues<sup>28</sup> should also have observed savings on  
611 Low PT trials. In addition, the rotation occurred at four separate targets in Experiment 3, but only one  
612 target in Haith and colleagues. Lastly, reaction time constraints in Experiment 3 induced shorter reach  
613 latencies (nearing 200 ms), than those used by Haith and colleagues (300 ms). These conditions would be  
614 expected to suppress explicit caching. Nevertheless, future studies are needed to better understand the  
615 conditions (e.g., number of targets, reaction time constraints) that permit caching of the explicit process,  
616 and how these cached responses interact with implicit learning.

617 Finally, it is important to distinguish between reductions in implicit adaptation which appear to  
618 be driven by explicit suppression, versus those that are caused by a direct impairment in the implicit  
619 response to error. For example, when two opposing perturbations are experienced sequentially, the  
620 response to the second exposure is impaired by anterograde interference<sup>9,25,27,65</sup>. Recently, we linked  
621 these impairments in learning rate to a transient reduction in error sensitivity which recovers over time<sup>26</sup>.  
622 Here, we limited reaction time to isolate the potential implicit contributions to this impairment.  
623 Impairments in the implicit system were large and long-lasting (Fig. 7C), persisting even after 24 hours.

624 Interestingly, when we performed a similar experiment without restricting reaction time<sup>26</sup>, we  
625 found a smaller impairment in learning rate that almost fully recovered after 24 hours (Fig. 7C, no limit).  
626 These differences might suggest that uninhibited explicit strategies compensate for lingering deficits in  
627 implicit adaptation. In fact, Leow and colleagues<sup>17</sup> recently demonstrated that prior exposure to task  
628 errors in one direction increases the rate at which participants explicitly adapt to a visuomotor rotation in  
629 the opposite direction, suggesting that explicit strategies might exhibit improvements rather than  
630 impairments during interference protocols. However, it is important to point out that our reaction time-  
631 limited experiment in Fig. 7, differed from our earlier work<sup>26</sup> (see Methods; reaching versus pointing as  
632 well as differences in trial count). Thus, our data motivate the need for future experiments to understand  
633 how explicit strategies contribute to adaptation during anterograde interference.

634  
635 *Competition-driven enhancement and suppression of implicit adaptation*



636 Our data caution that when implicit learning increases or decreases, this does not necessarily mean that  
637 the implicit system has altered its response to error.

638 For example, when participants are made aware of a visuomotor rotation before it is introduced,  
639 their explicit response is drastically enhanced<sup>15,16</sup>. These increases in explicit strategy are coupled to  
640 decreases in implicit adaptation. A similar phenomenon can be observed in other experiments where  
641 participants are provided with visual landmarks scattered on either side of the target. When participants  
642 use these landmarks to report their intended aiming direction, reporting frequency increases explicit  
643 strategy use, but decreases implicit adaptation<sup>66-68</sup>. Furthermore, participants themselves exhibit varying  
644 degrees of strategy, leading to negative subject-to-subject associations between implicit and explicit  
645 learning<sup>15,16,41</sup> (Fig. 3).

646 Given these changes in implicit adaptation, it may at first seem surprising that in some cases,  
647 implicit learning remains constant across large changes in perturbation magnitude<sup>15,69</sup>. For example, in  
648 Neville and Cressman<sup>15</sup>, while awareness decreased implicit adaptation, the implicit aftereffect was  
649 mostly invariant across each rotation size (Fig. 1). Notably, the competition equation (Eq. (4)) can again  
650 account for this observation. This equation shows that the driving force for adaptation is not the size of  
651 the rotation alone, but rather the difference between the rotation and explicit strategy (Fig. S1D).

652 This competition between implicit and explicit adaptation helps to reveal the errors which drive  
653 implicit learning. This competitive relationship (Eq. (4)) naturally arises when implicit systems are driven  
654 by errors in task outcome (Eq. (1)), but not errors between the cursor and intended aiming angle (Eq. (2)).  
655 We can observe these negative interactions not solely when enhancing explicit strategy, but also when  
656 suppressing re-aiming. For example, in cases where perturbations are introduced gradually, thus reducing  
657 conscious awareness, implicit “procedural” adaptation appears to increase<sup>38,42,70</sup> (Fig. 2). Similarly, when  
658 participants are required to move with minimal preparation time, thus suppressing time-consuming  
659 explicit re-aiming<sup>28,41,47</sup>, the total extent of implicit adaptation also appears to increase<sup>37,41</sup>.

660 Lastly, competition may help to describe not only why implicit learning can vary across two  
661 experimental conditions, but also across individuals within a single experiment as in Fig. 3H. In one prime  
662 example, Miyamoto and colleagues<sup>14</sup> exposed participants to a sum-of-sines rotation. Curiously,  
663 participants with more vigorous explicit responses to the perturbation exhibited less vigorous implicit  
664 learning. In a second example, Fernandez-Ruiz and colleagues<sup>41</sup> observed that participants who increased  
665 their movement preparation time rapidly counteracted a rotation, but also exhibited smaller aftereffects  
666 during washout. And as a third example, when Bromberg et al.<sup>68</sup> measured eye movements during  
667 adaptation, participants who tended to look towards their re-aiming locations not only exhibited greater  
668 explicit strategies, but less implicit adaptation.

669 In other words, participants that used cognitive strategies to adapt exhibited less procedural  
670 learning<sup>41</sup>. To explain these individual correlations, Miyamoto et al.<sup>14</sup> suggested that there may be an  
671 intrinsic relationship between implicit and explicit sensitivity to error: when an individual’s explicit error  
672 sensitivity is high, their implicit error sensitivity is low. Here our results describe a different way to account  
673 for the same observation (Fig. 3H). In Experiment 1, we used the competition equation (Eq. (4)) to predict  
674 each individual’s implicit adaptation from their measured explicit strategy, assuming each participant had  
675 the same sensitivity to error. This one equation accurately accounted for the inverse relationship between  
676 implicit and explicit aftereffects. Thus, negative individual-level correlations between implicit and explicit

677 adaptation can arise from subject-to-subject variation in strategy, even when implicit error sensitivity is  
678 invariant across participants.

679 Finally, it is important to consider how generalization may have altered our implicit learning  
680 measures. Earlier studies have shown that when participants are asked to report their aiming direction  
681 using a ring of visual landmarks, implicit learning generalizes around the reported aiming direction<sup>71,72</sup>.  
682 Thus, participants who aim further away from the target may show smaller implicit adaptation when  
683 asked to “move straight to the target” simply due to generalization. However, the expected magnitude of  
684 this effect ( $\approx 5^\circ$ ; see Fig. S5B for aim-target displacement<sup>71</sup> of  $22.5^\circ$  and S3A for aim-target displacement<sup>72</sup>  
685 of  $30^\circ$ ) does not seem large enough to account for the large variation we measured in implicit adaptation  
686 (ranges of  $17^\circ$  in Fig. 2F,  $32^\circ$  in Fig. 3D,  $14^\circ$  in Fig. 3H,  $17^\circ$  in Fig. 3L). In the studies considered here,  
687 participants trained at either 3 (Fig. 1), 4 (Figs. 3H&L), 8 (Fig. 3D), or 12 (Fig. 2) targets, as opposed to 1  
688 target in these earlier generalization studies<sup>71,72</sup> (Figs. S3A and S3B). Thus, generalization-based decreases  
689 in implicit learning would likely be smaller in the current work, given that the generalization function  
690 widens with additional training targets<sup>73,74</sup>.

691 Along these lines, Neville and Cressman<sup>15</sup> asked whether implicit learning varied across their 3  
692 training targets, 2 of which corresponded with an “aim solution”, 1 of which did not; they did not find any  
693 change in implicit learning across each target. In addition to differences in training targets, the studies  
694 considered here did not use aiming reports to measure explicit learning, which were employed on each  
695 trial to measure aim direction in the earlier generalization studies. This may play another important role  
696 in the generalization function. For example, in these earlier generalization studies implicit learning  
697 measured via reporting was larger than that measured when reaching straight to the target (Fig. S5C), due  
698 to generalization. However, in Experiment 1, when we asked participants to report their aim at the end  
699 of adaptation, we found greater implicit learning on the straight-ahead reaching probes, than in the aim  
700 reports (Fig. S5E), opposite the generalization expectation. A similar phenomenon was noted recently  
701 when aim reports were used sparsely during adaptation<sup>75</sup> (Fig. S5D). All in all, while it does not seem that  
702 generalization played a major role in our primary results, future studies are needed to measure how  
703 generalization may differ across tasks, as well as different types of error signals (e.g., target error vs. SPE).

704

#### 705 *Error sources that drive implicit adaptation*

706 Mazzoni and Krakauer<sup>12</sup> exposed participants to a visuomotor rotation, but also provided instructions for  
707 how to re-aim their hand to achieve success. While participants immediately used this strategy to move  
708 the cursor through the target, the elimination of task error failed to stop implicit adaptation. These data  
709 suggested that implicit systems responded to errors in the predicted sensory consequence of their  
710 actions<sup>20,76</sup>, rather than errors in hitting the target.

711 However, such a model, where implicit systems learn solely based on the angle between aiming  
712 direction and the cursor (Eq. (2)), could not account for the implicit-explicit interactions we observed in  
713 some of the data (Figs. 1-3). These interactions could only be described by an implicit error source that is  
714 altered by explicit strategy, such as the angle between the cursor and the target (Eq. (1)). For example, in  
715 Experiments 1&2, participants did not aim straight to the target, but rather adjusted their aiming angle  
716 by  $5\text{-}20^\circ$  (Fig. 3). These changes in re-aiming appeared to alter implicit adaptation via errors between the  
717 cursor and the target. This target-cursor error source (Eq. (1)) used in our state-space model (Eq. (3))

718 appeared to provide an accurate account of short-term visuomotor adaptation across a number of  
719 studies<sup>14–16,24,37,41,42</sup>.

720 We do not mean to suggest however, that implicit adaptation is solely driven by a single target  
721 error. In fact, there are many cases where this idea fails<sup>11,12,21</sup>, beyond the Mazzoni and Krakauer study.  
722 We speculate that one feature which alters implicit learning is the simultaneous presence of multiple  
723 visual targets. In Figs. 1-7, there was only one visual target on the screen at a time. However, in Mazzoni  
724 and Krakauer (Fig. 8), there were two important visual targets: the adjacent target towards which  
725 participants explicitly aimed their hand, and the original target towards which the cursor should move.  
726 Thus, in theory there were two potential visual target errors. Interestingly, when we considered the  
727 possibility that the implicit system adapted to both errors at the same time, we could more completely  
728 account for these earlier data (Fig. 8F).

729 The idea that both kinds of visual error (cursor with respect to the primary target, and cursor with  
730 respect to the aimed target) drive implicit learning, could potentially help to describe other confounding  
731 observations. For example, in cases where landmarks are provided to report explicit aiming<sup>11,24,72</sup>, target-  
732 cursor error is often rapidly eliminated, but implicit adaptation continues to increase over time. Our dual-  
733 error model (Eq. (6)) would explain this continued adaptation based on persistent aim-cursor error.

734 However, the nature of this aim-cursor error remains rather uncertain. For example, while this  
735 error source generates strong adaptation when the aim location coincides with a physical target (Fig. 8H,  
736 instruction with target), implicit learning is observed even in the absence of a physical aiming landmark<sup>21</sup>  
737 (Fig. 8H, instruction without target), albeit to a smaller degree. This latter condition strongly implicates an  
738 SPE learning mechanism. Thus, it may be that the aim-cursor error is actually an SPE that is enhanced by  
739 the presence of a physical target. In this view, implicit learning is driven by a target error module and an  
740 SPE module that is enhanced by a visual target error<sup>17,23,77</sup>. These various implicit learning modalities are  
741 likely strongly dependent on both implicit and explicit contexts, in ways we do not currently understand.

742 We speculate that the cerebellum might play an important role in this model of implicit  
743 adaptation<sup>55,57,78–80</sup>. Current models propose that complex spikes in Purkinje cells (P-cells) in the cerebellar  
744 cortex lead to LTD (Marr-Albus-Ito hypothesis). These complex spikes are reliably evoked by olivary input  
745 in response to a sensory error<sup>79,81,82</sup>. However, different P-cells are activated by different error directions,  
746 thus organizing P-cells into error-specific subpopulations<sup>81,82</sup>. Therefore, our model suggests that two  
747 different sources of error might simultaneously transduce learning in two different P-cell subpopulations,  
748 which then combine their adapted states into a total implicit correction at the level of the deep nuclei.  
749 Thus, errors based on the original target, and the aiming target, might simultaneously activate two implicit  
750 learning modules in the cerebellum (Fig. 8G).

751 Alternatively, it is equally possible that these aim-cursor errors and target-cursor errors engage  
752 separate brain regions both inside and outside the cerebellum. In this view, an interesting possibility is  
753 that patients with cerebellar disorders may have learning deficits<sup>20,54,56,83,84</sup> specific to one error but not  
754 the other. These possibilities remain to be tested.

755  
756

## 757 **Methods**

758 Here we describe the experiments and corresponding analysis reported in the main text. Much of this  
759 work involves reevaluation of earlier literature; this includes data from Haith and colleagues<sup>28</sup> in Figs. 4&6,  
760 data from Lerner and Albert et al.<sup>26</sup> in Fig. 7, data from Neville and Cressman<sup>15</sup> in Fig. 1, data from Saijo  
761 and Gomi<sup>42</sup> in Fig. 2, data from Fernandez-Ruiz et al.<sup>41</sup> in Fig. 3, data from Mazzoni and Krakauer<sup>12</sup> in Fig.  
762 8, and data from Taylor and Ivry<sup>21</sup> in Fig. 8. Furthermore, some generalization data<sup>71,72</sup> was considered in  
763 Fig. S5. The relevant details of these studies are summarized in the sections below alongside the new data  
764 collected for this work (Experiments 1-4).

765

### 766 *Participants*

767 A detailed description of participants in Haith and colleagues<sup>28</sup> (n=14), Lerner and Albert et al.<sup>26</sup> (n=34 for  
768 5 min and 24 hr groups), Neville and Cressman<sup>15</sup> (n=63), and Mazzoni and Krakauer<sup>12</sup> (n=18), Saijo and  
769 Gomi<sup>42</sup> (n=9 for abrupt, n=9 for gradual), Fernandez-Ruiz et al.<sup>41</sup> (n=9), and Taylor and Ivry<sup>21</sup> (n=10 for  
770 instruction with visual target, n=10 for instruction without visual target) are described in their respective  
771 papers. All volunteers (ages 18-62) in Experiments 1-4 were neurologically healthy and right-handed.  
772 Experiment 1 include n=9 participants (5 Male, 4 Female) in the No PT limit group and included n=13  
773 participants (6 Male, 7 Female) in the PT Limit group. Experiment 2 included n=17 participants (10 Male,  
774 7 Female). Experiment 3 included n=10 participants (6 Male, 4 Female). Experiment 4 included n=20  
775 participants (10 Male, 10 Female). Experiments 1-4 were approved by the Institutional Review Board at  
776 the Johns Hopkins School of Medicine.

777

### 778 *Apparatus*

779 In Experiments 1, 3, and 4 participants held the handle of a planar robotic arm and made reaching  
780 movements to different target locations in the horizontal plane. The forearm was obscured from view by  
781 an opaque screen. An overhead projector displayed a small white cursor (diameter = 3mm) on the screen  
782 that tracked the motion of the hand. Throughout testing we recorded the position of the handle at  
783 submillimeter precision with a differential encoder. Data were recorded at 200 Hz. Protocol details were  
784 similar for Haith and colleagues<sup>28</sup>, Neville and Cressman<sup>15</sup>, Saijo and Gomi<sup>42</sup>, and Fernandez-Ruiz et al.<sup>41</sup> in  
785 that participants gripped a two-link robotic manipulandum, were prevented from viewing their arm, and  
786 received visual feedback of their hand position in the form of a visual cursor. In Lerner and Albert et al.<sup>26</sup>,  
787 participants performed pointing movements with their thumb and index finger while gripping a joystick  
788 with their right hand. In Mazzoni and Krakauer<sup>12</sup>, participants rotated their hand to displace an infrared  
789 marker placed on the index finger. In Taylor and Ivry<sup>21</sup>, hand position was tracked via a sensor attached  
790 to the index finger while participants made horizontal reaching movements along the surface of a table.  
791 In Experiment 2, participants were tested remotely on their personal computer. They moved a cursor on  
792 the screen by sliding their index finger along the track pad.

793

### 794 *Visuomotor rotation*

795 Experiments 1-4 followed a similar protocol. At the start of each trial, the participant brought their hand  
796 to a center starting position (circle with 1 cm diameter). After maintaining the hand within the start circle,  
797 a target circle (1 cm diameter) appeared in 1 of 4 positions (0°, 90°, 180°, and 270°) at a displacement of  
798 8 cm from the starting circle (in Experiment 2, 8 targets were actually used, spaced in increments of 45°).

799 Participants then performed a “shooting” movement to move their hand briskly through the target. Each  
800 experiment consisted of epochs of 4 trials (or 8 trials for Experiment 2) where each target was visited once  
801 in a pseudorandom order.

802 Participants were provided audiovisual feedback about their movement speed and accuracy. If a  
803 movement was too fast (duration < 75ms) or too slow (duration > 325ms) the target turned red or blue,  
804 respectively. If the movement was the correct speed, but the cursor missed the target, the target turned  
805 white. Successful movements were rewarded with a point (total score displayed on-screen), an on-screen  
806 animation, and a pleasing tone (1000 Hz). If the movement was unsuccessful, no point was awarded and  
807 a negative tone was played (200 Hz). Participants were instructed to obtain as many points as possible  
808 throughout the experimental session.

809 Once the hand reached the target, visual feedback of the cursor was removed, and a yellow  
810 marker was frozen on-screen to provide static feedback of the final hand position. At this point,  
811 participants were instructed to move their hand back to the starting position. The cursor remained hidden  
812 until the hand was moved within 2 cm of the starting circle.

813 Movements were performed in one of three conditions: null trials, rotation trials, and no feedback  
814 trials. On null trials, veridical feedback of hand position was provided. On rotation trials, the on-screen  
815 cursor was rotated relative to the start position. On no feedback trials, the subject cursor was hidden  
816 during the entire trial. No feedback was given regarding movement endpoint, accuracy, or timing.

817 As a measure of adaptation, we analyzed the reach angle on each trial. The reach angle was  
818 measured as the angle between the hand and the target (relative to the start position), at the moment  
819 where the hand exceeded 95% of the target displacement.

820 Experiments in Haith and colleagues<sup>28</sup>, Lerner and Albert et al.<sup>26</sup>, Neville and Cressman<sup>15</sup>, Taylor  
821 and Ivry<sup>21</sup>, Saijo and Gomi<sup>42</sup>, Fernandez-Ruiz et al.<sup>41</sup>, and Mazzoni and Krakauer<sup>12</sup> were collected using  
822 similar, but separate protocols. For a full description of these paradigms, please consult the corresponding  
823 manuscripts. Important differences between these experiments and the rotation protocol mentioned  
824 above are briefly described in the sections below.

825

### 826 *Statistics*

827 Parametric (t-test) and nonparametric (Wilcoxon signed-rank test) tests were performed in MATLAB  
828 R2018a. For these tests, we report the p-value, and Cohen’s d as a measure of effect size.

829

### 830 *Competition Map*

831 To illustrate the way implicit and explicit systems might interact, we used a state space model (Eqs. (1-3))  
832 where implicit and explicit learning were driven by target errors. Similar to the implicit system described  
833 in Eq. (3), we modeled explicit learning as a process of learning and forgetting<sup>14,24</sup>:

$$834 \quad x_e^{(n+1)} = a_e x_e^{(n)} + b_e e^{(n)} \quad (7)$$

835 Here,  $a_e$  and  $b_e$  represent the explicit system’s retention factor and error sensitivity. Together Eqs. (3) and  
836 (7) describe how implicit and explicit systems adapt to error between the target and cursor (Eq. (1)).

837 Because implicit and explicit systems share a common error source in this target error model,  
838 their responses will exhibit competition. That is, increases in explicit adaptation will necessarily be coupled  
839 to decreases in implicit adaptation. To summarize this interaction, we created a competition map. The

840 competition map describes common scenarios in which the goal is to compare two different learning  
841 curves. For example, one might want to compare the response to a 30° visuomotor rotation under two  
842 different experimental conditions. Another example would be savings, where we compare adaptation to  
843 the same perturbation at two different timepoints. In these cases, it is common to measure the amount  
844 of implicit and explicit adaptation, and compare these across conditions or timepoints.

845 The critical point is that changes in the amount of implicit adaptation reflect the modulation of  
846 both implicit and explicit responses to error. To demonstrate this idea, we needed a way to quantify the  
847 amount of implicit adaptation. For this, we chose the steady-state amount of implicit learning. As  
848 described in the main text, the steady-state level of implicit adaptation can be derived from Eqs. (1-3).  
849 This derivation resulted in the competition equation shown in Eq. (4). Note that Eq. (4) predicts the steady-  
850 state level of implicit learning from the implicit retention factor, implicit error sensitivity, mean of the  
851 perturbation, and critically, the steady-state explicit strategy. If the explicit system is also described using  
852 a state space model as in Eq. (7), it is easy to show that Eq. (4) can be equivalently expressed in terms of  
853 the implicit and explicit learning parameters according to Eq. (8):

$$854 \quad x_i^{ss} = \frac{b_i(1-a_e)}{(1-a_i+b_i)(1-a_e+b_e)-b_ib_e} r \quad (8)$$

855 Eq. (8) provides the total amount of implicit adaptation as a function of the retention factors,  $a_i$  and  $a_e$ , as  
856 well as the error sensitivities,  $b_i$  and  $b_e$ . We used Eq. (8) to construct the competition map in Fig. 5A, by  
857 comparing the total amount of implicit learning across a reference condition and a test condition.

858 For our reference condition, we fit our state space model to the mean behavior in Haith et al.<sup>28</sup>  
859 (Fig. 4B, Day 1, left). This model best described adaptation during the first perturbation exposure using  
860 the parameter set:  $a_s=0.9829$ ,  $a_f=0.9278$ ,  $b_s=0.0629$ ,  $b_f=0.0632$ . Next, we imagined that implicit error  
861 sensitivity and explicit error sensitivity differed across the reference and test conditions. On the x-axis of  
862 the map, we show a percent change in  $b_i$  from the reference condition to the test condition. On the y-axis  
863 of the map, we show a percent change in  $b_e$  from the reference condition to the test condition. The  
864 retention factors were held constant across conditions. Then for each condition we calculated the total  
865 amount of implicit learning using Eq. (8). The color at each point in the map represents the percent change  
866 in the total amount of implicit learning from the reference condition to the test condition.

867 As described in the main text, the competition map (Fig. 5A) is composed of several important  
868 regions (Fig. 5B). In Region A, there is a decrease in implicit error sensitivity (from reference to test) as  
869 well as a decrease in the total amount of implicit adaptation predicted by Eq. (8). In Region B, Eq. (8)  
870 predicts a decrease in implicit adaptation, despite an increase in implicit error sensitivity. In Region D,  
871 there is an increase both in implicit error sensitivity as well as steady-state implicit learning. In Region E,  
872 there is an increase in implicit adaptation, despite a decrease in implicit error sensitivity. Finally, Region C  
873 shows cases where there are changes in implicit error sensitivity, but the total absolute change in implicit  
874 adaptation (Eq. (8)) is less than 5%. To determine this region, we solved for the linear bounds that describe  
875 a 5% increase or a 5% decrease in the output of Eq. (8).

876

877 *Neville & Cressman (2018)*<sup>15</sup>

878 To understand how enhancing explicit strategy might alter implicit learning, we considered data collected  
879 by Neville and Cressman<sup>15</sup>. Here the authors tested how awareness of a visuomotor rotation altered the

880 adaptation process. To do this, participants (n=63) were divided into one of many groups. In the instructed  
881 groups (Fig. 1E, yellow) the nature of the perturbation as well as a compensatory strategy was provided  
882 to the participants prior to the introduction of the perturbation. In other groups, no instruction was  
883 provided (Fig. 1E, gray). During rotation periods, participants reached to three potential targets. Implicit  
884 and explicit contributions to behavior were measured at 4 different periods using “inclusion” and  
885 “exclusion” trials. During exclusion trials, the authors instructed participants to reach (without visual  
886 feedback) as they did during the baseline period prior to perturbation onset (without using any knowledge  
887 of the perturbation gained thus far). During inclusion trials, the authors instructed participants to reach  
888 (without visual feedback) using all knowledge gained about the perturbation. In this way, the aftereffect  
889 measured on exclusion trials served as a measurement of implicit adaptation, and the difference in  
890 aftereffects measured on inclusion and exclusion trials served as a measurement of explicit adaptation.

891 At the start of the experiment all participants performed a baseline period without a rotation for  
892 30 trials. Baseline implicit and explicit reach angles were then assayed using inclusion and exclusion trials.  
893 At this point, participants in the strategy group were briefed about the perturbation with an image that  
894 depicted how feedback would be rotated, and how they could compensate for it. Then all groups were  
895 exposed to the first block of a visuomotor rotation for 30 trials. Some participants experienced a 20°  
896 rotation (Fig. 1E, left), others a 40° rotation (Fig. 1E, middle), and others a 60° rotation (Fig. 1E, right).  
897 After this first block, implicit and explicit learning were assayed with inclusion and exclusion trials. This  
898 was followed by a second perturbation block, and another round of inclusion/exclusion trials. Finally, the  
899 experiment ended with a third perturbation block and a final round of inclusion/exclusion trials.

900 Here we focused on the measures of implicit and explicit adaptation obtained from inclusion and  
901 exclusion trials at the end of the final block. To obtain these data, we extracted the mean participant  
902 response and the associated standard error of the mean, directly from the primary figures reported by  
903 Neville and Cressman<sup>15</sup> using Adobe Illustrator CS6. The implicit and explicit responses in all 6 groups are  
904 shown in Fig. S1. The marginal effects of instruction (average over rotation sizes) and rotation size  
905 (average over instruction conditions) are shown in Figs. 1F and 1G respectively.

906 Finally, we tested whether the competition equation (Eq. (4)) or independence equation (Eq. (5))  
907 could account for the levels of implicit learning observed across rotation magnitude and awareness  
908 conditions. To do this, we used a bootstrapping approach. Using the mean and standard deviation  
909 obtained from the primary figures, we sampled hypothetical explicit and implicit aftereffects for 10  
910 participants. We then calculated the mean across these 10 simulated participants. After this, we used  
911 *fmincon* in MATLAB R2018a to find an implicit error sensitivity that minimized the following cost function:

$$912 \quad \theta_{fit} = \operatorname{argmin}_{\theta} \sum_{n=1}^6 (x_{i_n}^{ss} - \hat{x}_{i_n}^{ss})^2 \quad (9)$$

913 This cost function represents the difference between the simulated level of implicit adaptation, and the  
914 amount of implicit learning that would be predicted for a given perturbation size and simulated explicit  
915 adaptation, according to our competition framework (Eq. (4)) or independence framework (Eq. (5)). For  
916 this process, we set the implicit retention factor to 0.9565 (see *Measuring properties of implicit learning*).  
917 Therefore, only the implicit error sensitivity remained as a free parameter. In sum, we aimed to determine  
918 if a single implicit error sensitivity could account for the amount of adaptation across the no instruction  
919 group, instruction group, and each of the three perturbation magnitudes (20, 40, and 60°). The

920 combination of instruction and perturbation magnitude yielded 6 groups, hence the upper limit on the  
921 sum in Eq. (9). We repeated this process for a total of 10,000 simulated groups.

922 In Fig. 1F, we show the marginal effect of instruction on the implicit aftereffect. This was obtained  
923 by averaging across each of the 3 rotation magnitudes shown in Fig. S1, for each model. In Fig. 1G we  
924 show the marginal effect on rotation size on the implicit aftereffect. This was obtained by averaging across  
925 the instructed and non-instructed conditions for each rotation size shown in Fig S1, for each model.

926

927 *Saijo and Gomi (2010)*<sup>42</sup>

928 To understand how suppressing explicit strategy might alter implicit learning, we considered data  
929 collected by Saijo and Gomi<sup>42</sup>. In one of their experiments, the authors tested how perturbation onset  
930 altered the adaptation process. Subjects were divided into either an abrupt (n=9) or gradual group (n=9),  
931 and reached to 1 of 12 targets, which were ordered pseudorandomly in each cycle of 12 trials. After a  
932 baseline period of 8 cycles, a visuomotor rotation was introduced. The perturbation period lasted 32  
933 cycles. After this, the perturbation was removed for 6 cycles of a washout condition. Participants were  
934 exposed to either an abrupt rotation where the perturbation magnitude suddenly changed from 0° to 60°,  
935 or a gradual condition where the perturbation magnitude increased over smaller increments (10°  
936 increments that lasted 3 cycles each; Fig. 2A).

937 Here, we considered why participants in the abrupt perturbation condition achieved greater  
938 adaptation during the rotation period (smaller error in Fig. 2C) but exhibited a smaller aftereffect when  
939 the perturbation was removed. Our theory suggested that this may be due to competition. If the gradual  
940 condition suppressed explicit awareness of the rotation<sup>38</sup>, then Eq. (4) would predict increases in implicit  
941 learning which were observed in the aftereffects measured during the washout period (where explicit  
942 strategies were disengaged). However, the SPE model (Eq. (5)) would predict the same amount of implicit  
943 adaptation: the same aftereffect in each condition.

944 To test these hypotheses, we simulated implicit adaptation using the state-space model in Eq. (3).  
945 In Fig. 2D, we used an SPE for the error term in Eq. (3). In Fig. 2E, we used the target error for the error  
946 term in Eq. (3). We imagined that the total reach angle was determined based on the sum of implicit and  
947 explicit learning. However, these authors did not directly measure explicit strategies. Fortunately, Neville  
948 and Cressman<sup>15</sup> measured explicit strategies using inclusion and exclusion trials during a 60° abrupt  
949 rotation (yellow points, explicit aim in Figs. 2D&E).

950 We used these measurements in our abrupt simulations. Neville and Cressman observed that  
951 explicit strategies rapidly reached 35.5° and remained stable during adaptation. To approximate these  
952 data, we simulated abrupt explicit strategy using the exponential curve:  $x_e = 35.5 - 10e^{-2t}$  (Figs. 3D&E,  
953 explicit aim, black line). Note that the nature of this exponential curve is entirely inconsequential to our  
954 analysis, apart from its saturation level. Outside of the rotation period, we assumed explicit strategy was  
955 zero. This is consistent with data from Morehead et al.<sup>34</sup> that showed almost immediate disengagement  
956 in aiming strategy during washout (Fig. S2). For the gradual condition, we assumed explicit strategy was  
957 zero throughout the entire experiment (Figs. 3D&E, explicit aim, gradual), as the participants remained  
958 largely unaware of the rotation. This seemed consistent with the data; gradual participants adapted  
959 approximately 40°, and exhibited an aftereffect of about 38°, indicating a re-aiming angle less than even  
960 5°. Note, our primary results (Fig. 2F) were unchanged in a sensitivity test where we assumed 10° of re-  
961 aiming in the gradual group (not shown).



962 Thus, our simulations included two free parameters: error sensitivity ( $b_i$ ) and retention fraction ( $a_i$ )  
963 for the implicit system. In each simulation, we assumed that these parameters were identical across the  
964 gradual and abrupt groups. To fit these parameters, we minimized the following cost function:

$$965 \theta_{fit} = \operatorname{argmin}_{\theta} \sum_n (e_{abrupt}^{(n)} - \hat{e}_{abrupt}^{(n)})^2 + \sum_n (e_{gradual}^{(n)} - \hat{e}_{gradual}^{(n)})^2 \quad (10)$$

966 Eq. (10) is the sum of squared errors between the directional errors predicted by the model (Figs. 2D&E,  
967 directional error) and observed in the data (Fig. 2C) across all trials in the abrupt and gradual conditions.  
968 Note that each simulation incorporated variability. We simulated noisy directional errors using the  
969 standard errors shown in the data in Fig. 2C. In the explicit state, we added variability to each trial using  
970 the standard error in explicit strategy reported by Neville and Cressman<sup>15</sup>. For the implicit state, we used  
971 20% of the explicit variability, given that aiming strategies are more variable than implicit corrections<sup>14</sup>.  
972 We repeated these simulations 20,000 times, each time resampling our noise sources and then fitting our  
973 parameter set ( $a_i$  and  $b_i$ ) by minimizing Eq. (10) with *fmincon* in MATLAB R2018a. The mean implicit curve  
974 for the SPE learning model and target error learning model are shown in Figs. 2D and 2E respectively  
975 (implicit angle; mean  $\pm$  SD). Critically, in each simulation we measured the aftereffect that occurred on  
976 the first cycle of the washout period (Figs. 2D&E, aftereffect). The mean and standard deviation in these  
977 aftereffects is reported in Fig. 2F.

978 Finally, note that we obtained the directional errors in Fig. 2C used in our simulations, directly  
979 from the primary figure in the original manuscript (using the GRABIT routine in MATLAB R2018a). Please  
980 also note in the actual experiment, on some trials (7.1% of all trials), the perturbation was introduced  
981 midway during the reach to test feedback corrections at only 1 target location (the 0° target). These trials  
982 were not relevant for our current analysis. Otherwise, the visuomotor rotation was applied during the  
983 entire movement as in the standard paradigm. Also note that because the authors were also analyzing  
984 feedback responses, participants made 15 cm movements, with a 0.6 second movement duration at  
985 baseline. Here, we only wanted to consider the feedforward adaptive component. Fortunately, the  
986 authors reported initial movement errors 100 ms following movement onset that could not have been  
987 altered by feedback. Therefore, we used these early measures of adaptation in the current study.

988

989 *Fernandez-Ruiz et al. (2011)*<sup>41</sup>

990 In Figs. 3A-D, we show data collected and originally reported by Fernandez-Ruiz and colleagues<sup>41</sup>. In this  
991 experiment, participants made 10 cm reaching movements to 1 of 8 targets, pseudorandomly arranged  
992 in cycles of 8 trials. Here we report data from the unconstrained RT group described in the original  
993 manuscript. The experiment started with 3 cycles of null rotation trials, followed by 40 cycles of a 60°  
994 rotation. The experiment ended with a 20-cycle washout period (no rotation) where aftereffects were  
995 assessed. In Figs. 3B&C we show data from 2 example participants reported in the original manuscript. In  
996 Fig. 2D, the change in preparation time was calculated on the last cycle of the rotation period (relative to  
997 the baseline period). The aftereffect is the reach angle on the first cycle of the washout period. In Fig. S3,  
998 we report data from Fig. 3 of the original manuscript. Here the authors calculated the directional error  
999 and the change in preparation time across 5-cycle periods spanning the entire rotation. The points in Fig.  
1000 S3 show individual subjects for the first 5 and last 5 rotation cycles. All lines show the linear regression  
1001 across individual subjects in each color-coded period. Note that each line has a negative slope, indicating  
1002 that participants who increased their reaction time more consistently exhibited smaller directional errors

1003 through the entire rotation period. These data were extracted directly from the primary figures reported  
1004 by Fernandez-Ruiz and colleagues<sup>41</sup> using Adobe Illustrator CS6. The  $R^2$  value reported in Fig. 2D was  
1005 calculated from these extracted data.

1006

### 1007 *Experiment 1*

1008 To test whether changes in explicit strategy altered implicit learning, we recruited participants for two  
1009 experiments. In the first experiment, participants adapted to a visuomotor rotation without any limits  
1010 applied to preparation time (No PT limit), thus allowing participants to use explicit strategy. In a second  
1011 experiment, we strictly limited preparation time in order to suppress explicit strategy (Limit PT).

1012 Participants in the No PT limit condition began with 10 epochs of null trials (1 epoch = 4 trials),  
1013 followed by a rotation period of 60 epochs. Other details concerning the experiment paradigm are  
1014 described in *Visuomotor rotation*. At the end of the perturbation period, we measured the amount of  
1015 implicit and explicit learning. To do this, participants were instructed to forget about the cursor and  
1016 instead move their hand through the target without applying any strategy to compensate for the  
1017 perturbation. Furthermore, visual feedback was completely removed during these trials. All 4 targets were  
1018 tested in a randomized sequence. To quantify the total amount of implicit learning, we averaged the reach  
1019 angle across all targets (Figs. 3F&H). To calculate the amount of explicit adaptation, we subtracted this  
1020 measure of implicit learning from the mean reach angle measured over the last 10 epochs of the  
1021 perturbation prior to the verbal instruction.

1022 In the Limit PT group, we suppressed explicit adaptation for the duration of the experiment by  
1023 limiting the time participants had to prepare their movements. To enforce this, we limited the amount of  
1024 time available for the participants to start their movement after the target location was shown. This upper  
1025 bound on reaction time was set to 225 ms (taking into account average screen delay). If the reaction time  
1026 of the participant exceeded the desired upper bound, the participant was punished with a screen timeout  
1027 after providing feedback of the movement endpoint. In addition, a low unpleasant tone (200 Hz) was  
1028 played. This condition was effective in limiting reaction time (Fig. 3G, middle), even lower than the 300  
1029 ms threshold used by Haith and colleagues<sup>28</sup>. This experiment started with 10 epochs (1 epoch = 4 trials)  
1030 of null trials. After this, the visuomotor rotation was introduced for 60 epochs. At the end of the  
1031 perturbation period, we measured retention of the visuomotor memory in a series of 15 epochs of no  
1032 feedback trials (Fig. 3F, no feedback).

1033 Our goal was to test whether the putative implicit learning properties measured in the Limit PT  
1034 group could be used to predict the subject-to-subject relationship between implicit and explicit  
1035 adaptation in the No PT limit group (according to Eq. (4)). To do this, we measured each participant's  
1036 implicit retention factor and error sensitivity in the Limit PT condition (see *Measuring properties of implicit*  
1037 *learning* below). We then averaged each parameter across participants. Next, we inserted these mean  
1038 parameters into Eq. (4). With these variables specified, Eq. (4) predicted a specific linear relationship  
1039 between implicit and explicit learning (Fig. 3H, model). We overlaid this prediction on the actual amounts  
1040 of implicit and explicit adaptation measured in each No PT limit participant (Fig. 3H, black dots). We  
1041 performed a linear regression across these measured data (Fig. 3H, black line, measured). We report the  
1042 slope and intercept of this regression as well as the corresponding 95% confidence intervals.

1043 The individual differences between implicit and explicit learning in Experiment 1 (Fig. 3H) could  
1044 have been due uncertainty in our empirical probe (move hand through the target without re-aiming). That

1045 is, some participants may not have understood the instruction to move their hand through the target, and  
1046 instead continued to aim. These participants would appear to have very little explicit strategy, and high  
1047 amounts of implicit learning. Therefore, to verify our explicit measures, we considered two additional  
1048 explicit markers: movement preparation time and reported strategies. In Fig. S4B, we compared explicit  
1049 re-aiming with movement preparation time. That is, we calculated how much participant changed their  
1050 movement preparation time after the perturbation turned on (the mean preparation time over 20 cycles  
1051 following rotation onset, relative to the mean preparation time over the 3 cycles preceding rotation  
1052 onset). Changes in preparation time are known to correlate with strategic re-aim<sup>41,47</sup>.

1053 Lastly, we also asked participants to verbally report their explicit strategy. After the implicit probe  
1054 trials, we showed each target once again, with a ring of small white landmarks placed at an equal radial  
1055 distance around the screen<sup>24</sup>. A total of 108 landmarks was used to uniformly cover the circle. Each  
1056 landmark was labeled with an alphanumeric string. Subjects were asked to report the nearest landmark  
1057 that they were aiming towards at the end of the experiment in order to move the cursor through the  
1058 target when the rotation was on. The mean angle reported across all 4 targets was calculated to provide  
1059 an additional assay of explicit adaptation (Fig. S4A, explicit report angle). Explicit re-aiming is prone to  
1060 erroneous selections where the hand is mentally rotated in the wrong direction<sup>47</sup> (errors of same  
1061 magnitude, opposite sign) Therefore, for individual targets where the participant reported an explicit  
1062 angle in the opposite direction, we used its absolute value when calculating their explicit recalibration.  
1063 These strategy report trials were used to calculate the implicit learning estimate shown in Fig. S5E.

## 1064 1065 *Experiment 2*

1066 Here, we remotely tested a very similar paradigm to the No PT limit condition in Experiment 1. Participants  
1067 controlled a cursor by moving their index finger across the track pad of their personal computer. The  
1068 experiment was coded in Java. To familiarize themselves with the task, participants watched a 3-minute  
1069 instructional video. In this video, the trial structure, point system, and feedback structure were described.  
1070 After this video, there was a practice period. During the practice period, the software tracked the  
1071 participant's reach angle on each trial. If the participant achieved success on fewer than 65% of trials  
1072 (measured based on an angular target-cursor discrepancy  $\leq 30^\circ$ , reaction time  $\leq 1$  sec, and movement  
1073 duration  $\leq 0.6$  sec), they had to re-watch the instructional video and re-do the practice period.

1074 After the practice period ended, the testing period began. This testing period was almost identical  
1075 to the No PT limit condition in Experiment 1. On each trial, participants reached to 1 of 4 targets (up,  
1076 down, left, and right). Each target was visited once pseudorandomly in a cycle of 4 targets. After an initial  
1077 10-cycle null period, a  $30^\circ$  visuomotor rotation was imposed that lasted for 60 epochs. At the end of the  
1078 rotation period, we measured implicit and explicit adaptation. The experiment briefly paused, and an  
1079 audiovisual recording was played that instructed participants to not use any strategy and to move their  
1080 hand straight through the target. After this, the experiment resumed, feedback was removed, and  
1081 participants performed 20 cycles of no-aiming, no-feedback probe trials (Fig. 3J, no aiming).

1082 We measured subject-to-subject correlations between implicit and explicit adaptation. For this,  
1083 we calculated two implicit learning measures. The early implicit aftereffect was simply the aftereffect  
1084 observed on the first no-aiming, no-feedback probe cycle (Fig. 3L). The late implicit aftereffect was the  
1085 average aftereffect observed on the last 15 cycles of this no-aiming, no-feedback period (Fig. 3K). To  
1086 measure explicit learning, we calculated the difference between the total amount of adaptation (mean

1087 reach angle over last 10 cycles of the rotation period) and the first cycle of the no-aiming, no-feedback  
1088 period. We investigated the relationship between explicit adaptation and the early and late implicit  
1089 aftereffects via linear regression in Figs. 3L and 3K respectively. For the early implicit aftereffect, we  
1090 measured the 95% CI for the slope and intercept. Critically, this interval did not contain 1, indicating that  
1091 the subject-to-subject correlations cannot be described by the trivial case where all participants had  
1092 adapted the same amount by the end of the adaptation period (see main text).

1093

1094 *Haith et al. (2015)*<sup>28</sup>

1095 To understand how implicit and explicit processes contribute to savings, Haith and colleagues<sup>28</sup> designed  
1096 a forced preparation time task. Briefly, participants (n=14) performed reaching movements to two targets,  
1097 T1 and T2, under a controlled preparation time scenario. To control movement preparation time, four  
1098 audio tones were played (at 500 ms intervals) and participants were instructed to reach coincident with  
1099 the 4th tone. On high preparation time trials (High PT), the intended target was displayed during the entire  
1100 tone sequence. On low preparation time trials (Low PT), the intended target was switched approximately  
1101 300 ms prior to the 4th tone. High PT trials were more probable (80%) than Low PT trials (20%).

1102 After a baseline period (100 trials for each target), a 30° visuomotor rotation was introduced for  
1103 target T1 only. After 100 rotations trials (Exposure 1), the rotation was turned off for 20 trials. After a 24  
1104 hr break, participants then returned to the lab. On Day 2, participants performed 10 additional reaching  
1105 movements without a perturbation, followed by a second 30° rotation (Target T1 only) of 100 trials  
1106 (Exposure 2). The experiment then ended with a washout period of 100 trials for each target.

1107 We quantified the amount of savings expressed upon re-exposure to the perturbation, on High  
1108 PT and Low PT trials. We measured savings using two metrics. First, we measured the rate of learning  
1109 during each exposure to the perturbation using an exponential fit. We fit a two-parameter exponential  
1110 function to both Low PT and High PT trials during the first and second exposure (we constrained the third  
1111 parameter to enforce that the exponential begin at each participant's measured baseline reach angle).  
1112 We compared the exponential learning rate using a paired t-test (Fig. 4B, 3rd column).

1113 We also quantified savings in a manner similar to that reported by Haith and colleagues<sup>28</sup>; we  
1114 calculated the difference between the reach angles before and after the introduction of the perturbation,  
1115 during each exposure (Fig. 4C, 1st and 2nd columns). For High PT trials, we then computed the mean reach  
1116 difference over the 3 trials preceding, and 3 trials following perturbation onset. Given their reduced  
1117 frequency, for Low PT trials, we focused solely on the trial before and trial after perturbation onset. To  
1118 detect savings, we compared the pre-perturbation and post-perturbation differences using a paired t-test  
1119 (Fig. 4C, 3rd column).

1120 Finally, we also used a state-space model of learning to measure properties of implicit and explicit  
1121 learning during each exposure. We modeled implicit learning according to Eq. (3) and explicit learning  
1122 according to Eq. (7). In one model fitting procedure, we modeled error according to Eq. (1) for the  
1123 competitive framework. These results are shown in Fig. 4D. In a second model fitting procedure, we  
1124 modeled error according to Eq. (2) for the independent framework. These results are not shown in the  
1125 Fig. 4, but relevant statistical outcomes are reported in the main text.

1126 In the model, behavior is described as the summation of implicit and explicit learning. Each system  
1127 possessed a retention factor and error sensitivity. Here, we asked how implicit and explicit error sensitivity  
1128 might have changed from Exposure 1 to Exposure 2. Therefore, we assumed that the implicit and explicit

1129 retention factors were constant across perturbations, but allowed a separate implicit and explicit error  
1130 sensitivity during Exposures 1 and 2. Therefore, our modeling approach included six free parameters. We  
1131 fit this model to the measured behavior by minimizing the following cost function using *fmincon* in  
1132 MATLAB R2018a:

$$1133 \quad \theta_{fit} = \underset{\theta}{\operatorname{argmin}} \sum_{n=1}^N (y_1^{(n)} - \hat{y}_1^{(n)})^2 + (y_2^{(n)} - \hat{y}_2^{(n)})^2 \quad (11)$$

1134 Here  $y_1$  and  $y_2$  represent the reach angles during the first and second exposure. These reach angles are  
1135 composed of High PT and Low PT trials. On Low PT trials, the reach angle is equal to the implicit adaptive  
1136 process. On High PT trials, the reach angle is equal to the sum of the implicit adaptive process and the  
1137 explicit adaptive process.

1138 We fit this model to individual participant behavior, in the case where implicit learning was driven  
1139 by target errors (Eq. (1)), and also in the alternate case where it was driven by aim-cursor errors (Eq. (2)).  
1140 We report the implicit and explicit error sensitivities for the target-error learning case in Fig. 4D, right. For  
1141 this model, the predicted behavior is shown in the first two columns of Fig. 4D. We also fit the target-error  
1142 (Eq. (1)) model to the mean behavior across all participants in Exposure 1 and Exposure 2. We obtained  
1143 the following parameter set:  $a_s=0.9829$ ,  $a_f=0.9278$ ,  $b_{s,1}=0.0629$ ,  $b_{s,2}=0.089$ ,  $b_{f,1}=0.0632$ ,  $b_{f,2}=0.1078$ . Note  
1144 that the subscripts 1 and 2 denote error sensitivity during Exposure 1 and 2, respectively. These  
1145 parameters were used for our simulations in Fig. 5 (see *Competition Map*).

### 1146 1147 *Experiment 3*

1148 In Haith et al. (2015)<sup>28</sup>, no savings was observed on trials where preparation time was limited (Low PT  
1149 trials), consistent with the possibility that implicit learning processes are not modulated by past  
1150 experiences. Here, we questioned if savings in implicit learning processes might have been suppressed by  
1151 competition with explicit learning processes (see *Competition Map*). That is, if implicit and explicit  
1152 processes share error sources, changes in explicit learning could mask changes in implicit learning. The  
1153 way to test this possibility would be to eliminate explicit learning on all trials, to ensure that the error on  
1154 each trial is expressly available for the implicit learning system. Experiment 3 tested this possibility using  
1155 a limited preparation time condition.

1156 Limiting reaction time is known to suppress explicit strategy<sup>17,41,47</sup>. To limit reaction time, we used  
1157 the same procedure described above for Experiment 2. This condition was effective in limiting reaction  
1158 time (Fig. 6B, top row), even lower than the 300 ms threshold used by Haith and colleagues<sup>28</sup>.

1159 Experiment 3 used the 4-target protocol reported in *Visuomotor rotation*. Apart from that, its trial  
1160 structure was similar to that of Haith et al.<sup>28</sup>. After a familiarization period, subjects completed a baseline  
1161 period of 10 epochs (1 epoch = 4 trials for each target). At that point, we imposed a 30° visuomotor  
1162 rotation for 60 epochs (Exposure 1). At the end of this first exposure, participants completed a washout  
1163 period with no perturbation that lasted for 70 epochs. At the end of the washout period, subjects were  
1164 once again exposed to a 30° visuomotor rotation for 60 epochs (Exposure 2).

1165 We quantified savings in a manner consistent with Haith et al.<sup>28</sup>. First, we fit a two-parameter  
1166 exponential function to the reach angle during Exposures 1 and 2 (third parameter was used to constrain  
1167 the fit so exponential curve started at the reach angle measured prior to perturbation onset). We analyzed  
1168 any change in the rate parameter of the exponential using a paired t-test (Fig. 6C, top). Second, we also

1169 tested for differences in the initial amount of learning. To do this, we calculated the difference between  
1170 reach angle during Exposures 1 and 2 (Figs. 6A&B, bottom row). We then calculated the difference in  
1171 reach angle (Exposure 2 - Exposure 1) during the 4 epochs preceding and 4 epochs following rotation  
1172 onset. We compared these differences for Exposures 1 and 2 using a paired t-test (Fig. 6C, bottom).

1173

#### 1174 *Experiment 4*

1175 Lerner and Albert et al.<sup>26</sup> demonstrated that anterograde interference slows the rate of learning after 5  
1176 min (also 1 hr), but dissipates over time and is nearly gone after 24 hr. Here we wondered if this reduction  
1177 in learning rate could at least be in part driven by impairments in implicit learning. Because Lerner and  
1178 Albert et al.<sup>26</sup> did not constrain preparation time, one would expect that participants used both implicit  
1179 and explicit learning processes. In Experiment 2, we isolated the implicit component of adaptation by  
1180 limiting reaction time. We used the same technique to limit reaction time reported for Experiment 2. The  
1181 experiment paradigm is described in *Visuomotor rotation* above. With that said, we used 8 adaptation  
1182 targets as opposed to 4 targets, to match the protocol used by Lerner and Albert et al.<sup>26</sup>.

1183 The perturbation schedule is shown in Figs. 7A&B at top. We recruited two groups of participants,  
1184 a 5 min group (n=9), and a 24 hr group (n=11). After familiarization, all participants were exposed to a  
1185 baseline period of null trials lasting 5 epochs (1 epoch = 8 trials). Next participants were exposed to a 30°  
1186 visuomotor rotation for 80 cycles (Exposure A). At this point, the experiment ended. After a break,  
1187 participants returned to the task. For the 5 min group, the second session occurred on the same day. For  
1188 the 24 hr group, participants returned the following day for the second session. At the start of the second  
1189 session, participants were exposed to a 30° visuomotor rotation (Exposure B) whose orientation was  
1190 opposite to that of Exposure A. This rotation lasted for 80 epochs.

1191 We analyzed the rate of learning by fitting a two-parameter exponential function to the learning  
1192 curve during Exposures A and B (the third parameter was used to constrain the exponential curve to start  
1193 from the behavior on the first epoch of the rotation). For each participant we computed an interference  
1194 metric by dividing the exponential rate of learning during Exposure B, by that measured during Exposure  
1195 A (Fig. 7C, at right, blue). In addition, we also analyzed the reaction time of the participants during  
1196 Exposure B (Figs. 7A&B, middle, blue).

1197

#### 1198 *Lerner and Albert et al. (2020)<sup>26</sup>*

1199 Recently, Lerner and Albert et al.<sup>26</sup> demonstrated that slowing of learning in anterograde interference  
1200 paradigms is caused by reductions in sensitivity to error. Here, we re-analyze some of these data.

1201 Lerner and Albert et al.<sup>26</sup> studied how learning one visuomotor rotation altered adaptation to an  
1202 opposing rotation when these exposures were separated by time periods ranging from 5 min to 24 hr.  
1203 Here we focused solely on the 5 min group (n=16) and the 24 hr group (n=18). A full methodological  
1204 description of this experiment is provided in the earlier manuscript. Briefly, participants gripped a joystick  
1205 with the thumb and index finger which controlled an on-screen cursor. Their arm was obscured from view  
1206 using a screen. Targets were presented in 8 different positions equally spaced at 45° intervals around a  
1207 computer monitor. Each of these 8 targets was visited once (random order) in epochs of 8 trials. On each  
1208 trial, participants were instructed to shoot the cursor through the target.

1209 All experiment groups started with a null period of 11 epochs (1 epochs = 8 trials). This was  
1210 followed by a 30° visuomotor rotation for 66 epochs (Exposure A). At this point, the experiment ended.

1211 After a break, participants returned to the task. For the 5 min group, the second session occurred on the  
1212 same day. For the 24 hr group, participants returned the following day for the second session. At the start  
1213 of the second session, participants were immediately exposed to a 30° visuomotor rotation (Exposure B)  
1214 whose orientation was opposite to that of Exposure A. This rotation lasted for 66 epochs. Short set breaks  
1215 were taken every 11 epochs during Exposures A and B.

1216 Here as in the earlier work<sup>26</sup>, we analyzed the rate of learning by fitting a two-parameter  
1217 exponential function to the learning curve during Exposures A and B (the third parameter was used to  
1218 constrain the exponential curve to start from the behavior on the first epoch of the rotation). For each  
1219 participant we computed an interference metric by dividing the exponential rate of learning during  
1220 Exposure B, by that measured during Exposure A (Fig. 7C, green). In addition, we also analyzed the reaction  
1221 time of the participants during Exposure B. The mean reaction time over the first perturbation block is  
1222 shown in Figs. 7A&B (middle, green traces).

1223  
1224 *Mazzoni and Krakauer (2006)*<sup>12</sup>

1225 In this study, subjects sat in chair with their arm supported on a tripod. An infrared marker was attached  
1226 to a ring placed on the participant's index finger. The hand was held closed with surgical tape. Participants  
1227 moved an on-screen cursor by rotating their hand around their wrist. These rotations were tracked with  
1228 the infrared marker. On each trial, participants were instructed to make straight out-and-back movements  
1229 of a cursor through 1 of 8 targets, spaced evenly in 45° intervals. A 2.2 cm marker translation was required  
1230 to reach each target. Note that all 8 targets remained visible throughout the task.

1231 Two groups of participants were tested with a 45° visuomotor rotation. In the no-strategy group,  
1232 participants adapted as per usual, without any instructions. After an initial null period, the rotation was  
1233 turned on (Fig. 8A, blue, adaptation). After about 60 cycles of adaptation, the rotation was turned off and  
1234 participants performed another 60 of washout trials (Fig. 8A, blue, washout). The break between the  
1235 adaptation and washout periods in Fig. 8A, no-strategy, is simply for alignment purposes.

1236 The strategy group followed a different protocol. After the null period, participants reached for 2  
1237 movements under the rotation (Fig. 8A, 2 cycles no instruction, red). At this point, the subjects were told  
1238 that they made 2 errors, and that they could counter the error by reaching to the neighboring clockwise  
1239 target (all targets always remained onscreen). After the instruction, participants immediately reduced  
1240 their error to zero (point labeled instruction in red, Fig. 8A). They continued to aim to the neighboring  
1241 target under the rotation throughout the adaptation period. Note that the direction errors became  
1242 negative. This convention indicates overcompensation for the rotation, i.e., that participants are altering  
1243 their hand angle by more than their strategy aim of 45°. Towards the end of the adaptation period,  
1244 participants were told to stop re-aiming, and direct their movement back to the original target (Fig. 8A,  
1245 do not aim, rotation on). Then after several movements, the rotation was turned off as participants  
1246 continued to aim for the original target during the washout period.

1247 In Fig. 8A we show the error between the primary target (target 1) and cursor during the entire  
1248 experiment. In Fig. 8B we show the error between the aimed target (target 2) and cursor during the  
1249 adaptation period. Note that the aimed and primary targets are generally related by 45° when the strategy  
1250 group is re-aiming. We observed that initial adaptation rates (over first 24 movements, gray area in Fig.  
1251 8B) were similar, but the no-strategy group ultimately achieved greater implicit adaptation. These data

1252 were all obtained by using the GRABT routine in MATLAB 2018a to extract the mean (and standard error  
1253 of the mean) performance in each group from the figures shown in the primary article.

1254 To account for behaviors, we fit 1 of 3 models to the direction error during the adaptation period  
1255 shown in Fig. 8B. In all cases we modeled explicit re-aiming in the strategy group as an  
1256 an aim sequence that started at zero during the initial two movements, and then 45° for the rest of the  
1257 adaptation period (i.e., after the instruction to re-aim). In the no-strategy group, we modeled explicit  
1258 learning as an aim sequence that remained at zero throughout the adaptation period.

1259 In Fig. 8D, we modeled implicit learning based on the state-space model in Eq. (3) and target error  
1260 term defined in Eq. (1). This target error was defined as the difference between the primary target (i.e.,  
1261 the initial target displayed associated with task outcome) and the cursor. In Fig. 8E, we modeled implicit  
1262 learning based on the state-space model in Eq. (3) and the aim-cursor error defined in Eq. (2). This aim-  
1263 cursor error was defined as the difference between the aimed target (either 0° or 45°) and the cursor. Fig.  
1264 8F, shows our third and final model. In this model, implicit learning in the strategy group was modeled  
1265 using the dual-error system shown in Eq. (6). That is, there were two implicit modules, one which  
1266 responded to the target errors as in Fig. 8D, and the other which responded to aim-cursor errors as in Fig.  
1267 8E. The evolution of these errors is shown in Fig. 8G. In the no-strategy group, we modeled implicit  
1268 learning based on the primary target error alone and cursor.

1269 Each model in Figs. 8D-F were fit in an identical manner. We fit the implicit retention factor and  
1270 implicit error sensitivity to minimized squared error according to:

$$1271 \quad \theta_{fit} = \underset{\theta}{\operatorname{argmin}} \sum_{n=1}^N (y_{strategy}^{(n)} - \hat{y}_{strategy}^{(n)})^2 + (y_{no-strategy}^{(n)} - \hat{y}_{no-strategy}^{(n)})^2 \quad (12)$$

1272 In other words, we minimized the sum of squared error between our model fit and the observed behavior  
1273 across both the strategy and no-strategy groups in Fig. 8B. In other words, we constrained that each group  
1274 had the same implicit learning parameters. In the case of our dual-error model in Fig. 8F, we assumed that  
1275 each implicit module also possessed the same retention and error sensitivity. In sum, all model fits had  
1276 two free parameters (error sensitivity and retention) which were assumed to be identical independent of  
1277 instruction. This fit was performed using *fmincon* in MATLAB R2018a. The predicted behavior is shown in  
1278 Figs. 8D-F at bottom. For our best model (Fig. 8F), the model behavior is also overlaid in Fig. 8B.

1279  
1280 *Taylor and Ivry (2011)*<sup>21</sup>

1281 In Fig. 8H, we show data collected and originally reported by Taylor and Ivry<sup>21</sup>. In this experiment,  
1282 participants moved their arm at least 10 cm towards 1 of 8 targets, that were pseudorandomly arranged  
1283 in cycles of 8 trials. Only endpoint feedback of the cursor position was provided. The hand was slid along  
1284 the surface of a table while the position of the index finger was tracked with a sensor. After an initial  
1285 familiarization block (5 cycles), participants were trained how to explicitly rotate their reach angle  
1286 clockwise by 45°. That is, on each trial they were shown veridical feedback of their hand position, but were  
1287 told to reach to a neighboring target, that was 45° away from the primary illuminated target. After this  
1288 training and another null period, the adaptation period started where the cursor position was rotated by  
1289 45° in the counterclockwise direction for 40 cycles. The first 2 movements in the rotation exhibited large  
1290 errors (Fig. 8H, 2 movements no instruction). As in Mazzoni and Krakauer<sup>12</sup>, the participants were then



1291 instructed that they could minimize their error by adopting the aiming strategy they learned at the start  
1292 of the experiment. Using this strategy, participants immediately reduced their direction error to zero.

1293 Here we report data from two critical groups in this experiment. In the “instruction with target”  
1294 group (Fig. 8H, black, n=10) participants were shown the neighboring targets during the adaptation period  
1295 to assist their re-aiming. However, in the “instruction without target” group (Fig. 8H, yellow, n=10)  
1296 participants were only shown the primary target; the neighboring targets did not appear on the screen to  
1297 help guide re-aiming. Only participants in the “instruction with target” group exhibited the drift reported  
1298 by Mazzoni and Krakauer<sup>12</sup>. However, both groups exhibited an implicit aftereffect (Fig. 8H, aftereffect;  
1299 first cycle of washout period as reported in Fig. 4C of the original manuscript<sup>21</sup>).

1300 These data were extracted directly from the primary figures reported by Taylor and Ivry<sup>21</sup> using  
1301 Adobe Illustrator CS6. We used the means and standard deviations for our statistical tests on the implicit  
1302 aftereffect in Fig. 8H.

### 1303 1304 *Generalization studies*

1305 In our Discussion, we describe how generalization can alter measurements of implicit adaptation. Here  
1306 we report data from many earlier studies. In Fig. S5A, we show data collected by Day et al.<sup>72</sup>, reported in  
1307 Fig. 2 of the original manuscript. Here, participants were exposed to a 45° rotation while reaching to a  
1308 single target. On each trial they were asked to report their aiming direction, using a ring of visual  
1309 landmarks. In the “target” group in Fig. S5A, implicit aftereffects were periodically probed at the trained  
1310 target location, by asking participants to reach to the target without aiming. In the “aim” group in Fig.  
1311 S5A, implicit aftereffects were periodically probed at a target location 30° away from the trained target,  
1312 consistent with the direction of the most frequently reported aim. In Fig. S5A, we show the implicit  
1313 aftereffect measured on the first aftereffect trial at the end of the experiment. In Fig. S5C we again show  
1314 the implicit aftereffect measured at the trained target location in the “probe” condition. The “report”  
1315 condition shows the amount of implicit learning estimated by subtracting the reported explicit strategy  
1316 from the reported reach angle on the last cycle of the rotation.

1317 In Fig. S5B, we show data collected by McDougle et al.<sup>71</sup>, reported in Fig. 3A of the original  
1318 manuscript. Here participants were also exposed to a 45° rotation while reaching to a single target. At the  
1319 end of the experiment, participants were exposed to an aftereffect block where they reached 3 times to  
1320 16 different targets spaced in varying increments around the unit circle. In this aftereffect block feedback  
1321 was removed and participants were told to move straight to the target without re-aiming. This aftereffect  
1322 block was used to construct a generalization curve. In Fig. S5B we show data only from 2 relevant locations  
1323 on this curve. The “target” condition represents aftereffects probed at the training target. The “aim”  
1324 condition shows the aftereffect measured at 22.5° away from the primary target, which was the target  
1325 closest to the mean reported explicit re-aiming strategy of 26.2°.

1326 Lastly, in Fig. S5D we show data collected by Maresch et al.<sup>75</sup>, reported in Fig. 4b of the original  
1327 manuscript. This study was informative to our discussion because they report implicit aftereffects  
1328 measured using both exclusion trials (as in most of the data described in this manuscript) as well implicit  
1329 aftereffects measured using aim reports. In Fig. S5D we specifically show data from the IR-E group in the  
1330 original manuscript. We selected this group, because aim was only intermittently reported (4 trials for  
1331 every 80 normal adaptation trials), and also because there were many adaptation targets (8 total). Thus,  
1332 in most cases, participants only had to attend to a single target when reaching as in our primary results.

1333 The “probe” condition in Fig. S5D corresponds to the total implicit learning measured at the end of  
1334 adaptation by telling participants to reach without re-aiming. The “report” condition in Fig. S5D  
1335 corresponds to the total implicit learning estimated at the end of adaptation by subtracting the reported  
1336 aim direction from the measured reach angle.

1337 Note that data in Figs. S5A-D were extracted directly from the primary figures reported in the  
1338 original manuscripts using Adobe Illustrator CS6.

1339

#### 1340 *Measuring properties of implicit learning*

1341 Many of our model’s predictions depended on estimates of implicit retention factor and error sensitivity.  
1342 We obtained these using the Limit PT group in Experiment 2. To calculate the retention factor for each  
1343 participant, we focused on the no feedback period at the end of Experiment 2 (Figs. 8D, no feedback).  
1344 During these error-free periods trial errors were hidden, thus causing decay of the learned behavior. The  
1345 rate of this decay is governed by the implicit retention factor according to:

$$1346 \quad y^{(n)} = a_i^n y_{ss} \quad (13)$$

1347 Here  $y^{(n)}$  refers to the reach angle on the n-th no feedback trial, and  $y_{ss}$  corresponds to the asymptotic  
1348 behavior prior to the no feedback period. We used *fmincon* in MATLAB R2018a to identify the retention  
1349 factor which minimized the difference between the decay predicted by Eq. (13) and that measured during  
1350 the no feedback period. We obtained an epoch-by-epoch retention factor of  $0.943 \pm 0.011$  (mean  $\pm$  SEM).  
1351 Note that an epoch consisted of 4 trials, so this corresponded to a trial-by-trial retention factor of 0.985.  
1352 When modeling Neville and Cressman<sup>15</sup> (Fig. 1), we cubed this trial-by-trial term because each cycle  
1353 consisted of 3 different targets (final retention factor of 0.9565).

1354 Next, we measured implicit error sensitivity in the Limit PT group during rotation period trials. To  
1355 measure implicit error sensitivity on each trial, we used its empirical definition:

$$1356 \quad b^{(n_1)} = \frac{y^{(n_2)} - a^{n_2 - n_1} y^{(n_1)}}{e^{(n_1)}} \quad (14)$$

1357 Eq. (14) determines the sensitivity to an error experienced on trial  $n_1$  when the participant visited a  
1358 particular target T. This error sensitivity is equal to the change in behavior between two consecutive visits  
1359 to target T, on trials  $n_1$  and  $n_2$  divided by the error that had been experienced on trial  $n_1$ . In the numerator,  
1360 we account for decay in the behavior by multiplying the behavior on trial  $n_1$  by a decay factor that  
1361 accounted for the number of intervening trials between trials  $n_1$  and  $n_2$ . For each target, we used the  
1362 specific retention factor estimated for that target with Eq. (13).

1363 Using this procedure, we calculated implicit error sensitivity as a function of trial in Experiment 2.  
1364 To remove any potential outliers, we identified error sensitivity estimates that deviated from the  
1365 population median by over 3 median absolute deviations within windows of 10 epochs. As reported by  
1366 Albert and colleagues<sup>37</sup>, implicit error sensitivity increased over trials. Eqs. (4) and (5) require the steady-  
1367 state implicit error sensitivity observed during asymptotic performance. To estimate this value, we  
1368 averaged our trial-by-trial error sensitivity measurements over the last 5 epochs of the perturbation. This  
1369 yielded an implicit error sensitivity of  $0.346 \pm 0.071$  (mean  $\pm$  SEM).

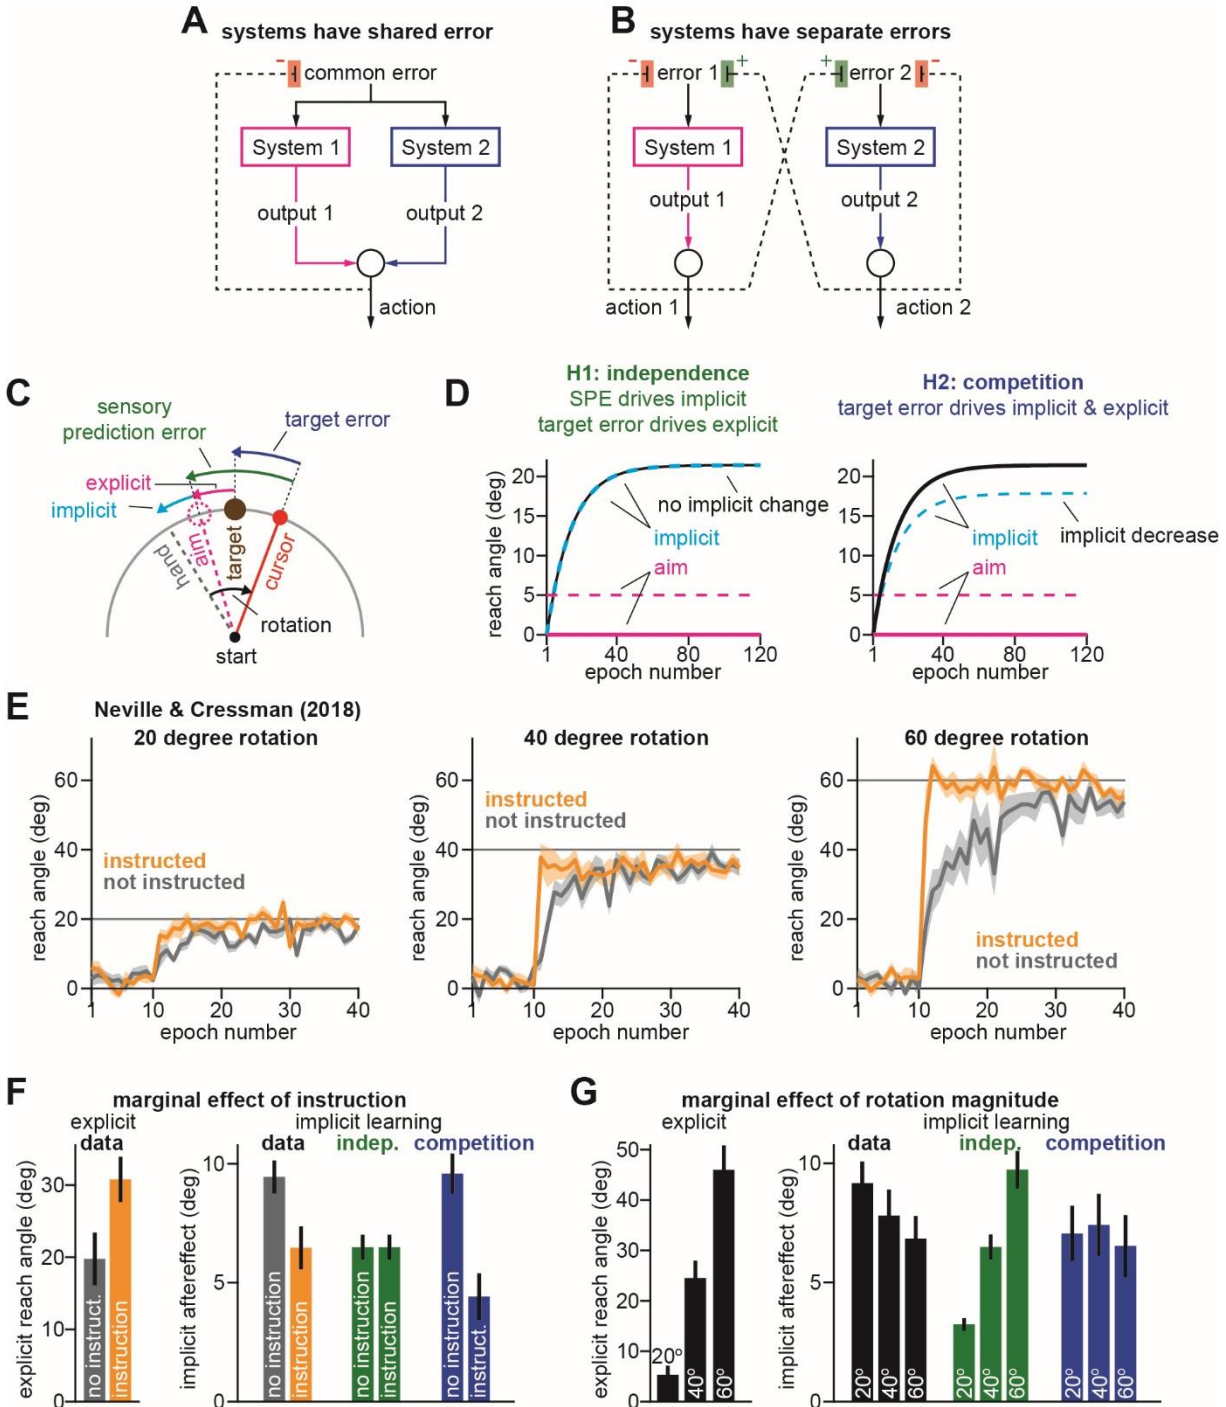

**Figure 1.** Enhancing explicit strategy suppresses implicit adaptation. **A.** Schematic showing competition between two cooperating parallel systems. Systems 1 and 2 receive the same error and produce outputs to reduce the error. Increases in one system’s output will decrease the error source for the partner system, suppressing its adaptation. **B.** Schematic showing competition between two parallel systems with differing objectives. Systems 1 and 2 receive different errors and produce an output that tends to increase the other system’s error. In this case, when one system is optimized, the other system is prevented from reducing its error. **C.** Schematic of visuomotor rotation. Participants move from S to T. Hand path is composed of explicit (aim) and implicit corrections. Cursor path is perturbed by

rotation. We explored two hypotheses: prediction error (H1, aim vs. cursor) vs. target error (H2, target vs. cursor) drives implicit learning. **D.** Prediction error hypothesis predicts that enhancing aiming (dashed magenta) will not change implicit learning (black vs. dashed cyan) according to the independence equation. Target error hypothesis predicts that enhancing aiming (dashed magenta) will decrease implicit adaptation (black vs. dashed cyan). **E.** Data reported by Neville and Cressman<sup>15</sup>. Participants were separated into 1 of 6 groups. Groups differed based on verbal instruction (instructed yellow; non-instructed gray) and rotation magnitude (20° left; 40° middle; 60° right). **F.** The marginal effect of instruction (average across 3 rotation sizes) shown for explicit adaptation at left and implicit learning at right. Learning predicted by the independence equation (green) and competition equation (blue) are shown. Models were fit assuming implicit error sensitivity and retention were identical across all 6 groups. **G.** The marginal effect of perturbation magnitude (average across instruction conditions) shown for explicit adaptation at left and implicit learning at right. Learning predicted by the independence equation (green) and competition equation (blue) are shown. Models were fit as in **F**. Error bars for data show mean  $\pm$  SEM. Error bars for model predictions refer to mean and standard deviation across 10,000 bootstrapped samples.

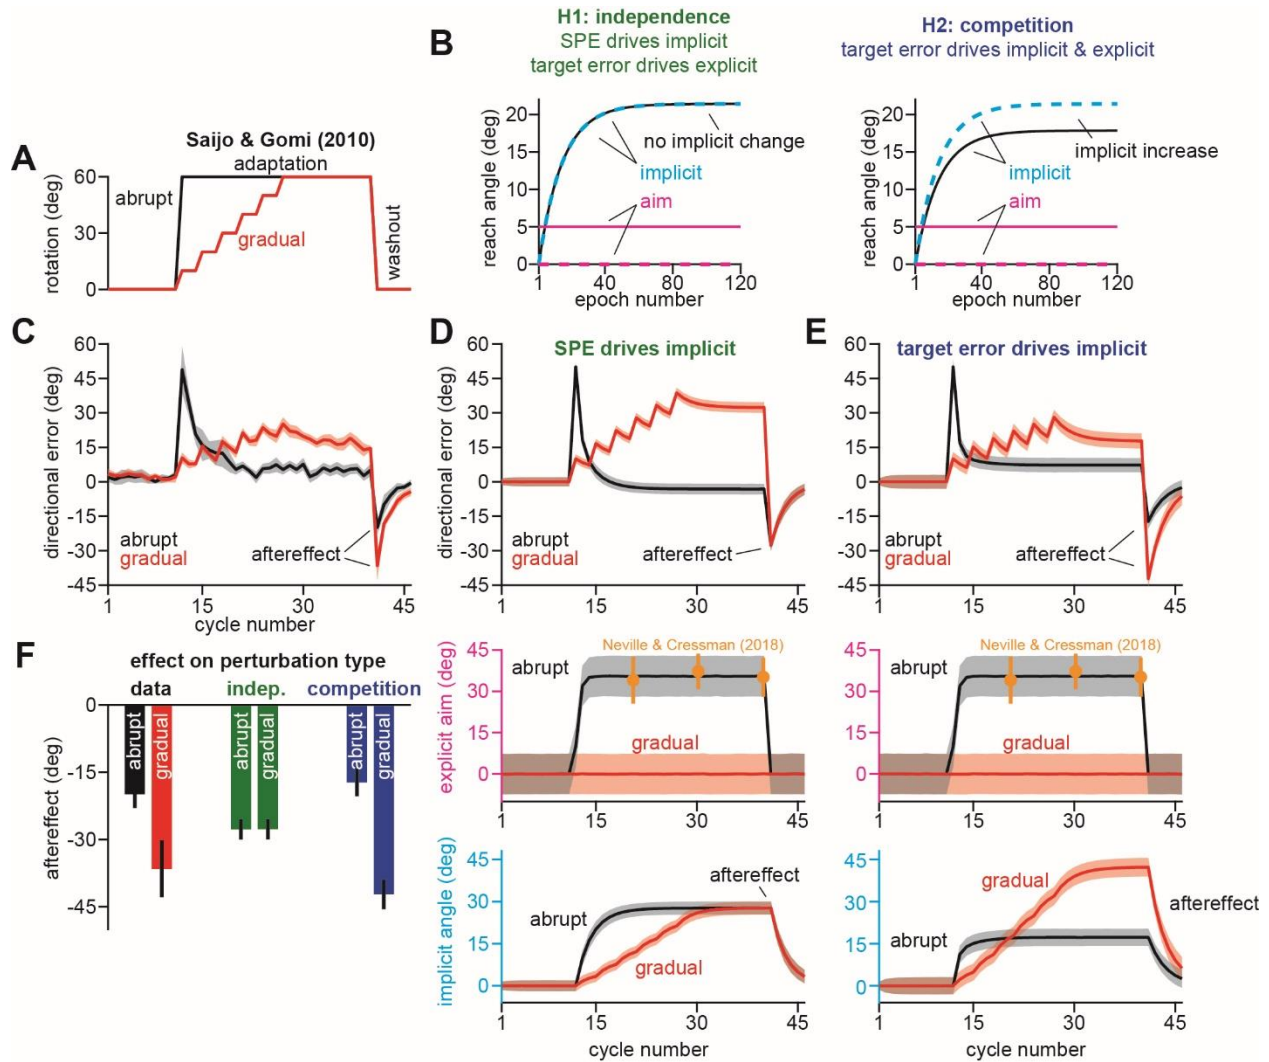

1  
2 **Figure 2.** Suppressing explicit strategy increases the total amount of implicit adaptation. Data reported from Saijo  
3 and Gomi<sup>42</sup>. **A.** Participants adapted to either an abrupt or gradual 60° rotation followed by a washout period. **B.** We  
4 explored two hypotheses: prediction error (H1, aim vs. cursor) vs. target error (H2, target vs. cursor) drives implicit  
5 learning. Prediction error hypothesis predicts that suppressing aiming (dashed magenta) through gradual  
6 perturbation onset will not change implicit learning (black vs. dashed cyan). Target error hypothesis predicts that  
7 suppressing aiming (dashed magenta) will increase implicit adaptation (black vs. dashed cyan). **C.** Directional error  
8 during adaptation. Note that while the abrupt group exhibited greater adaptation during the rotation, they also  
9 showed a smaller aftereffect suggesting less implicit adaptation. **D.** We simulated a state-space model where the  
10 implicit system learned from SPE. The model parameters were selected to best fit the data in **C.** In the middle row,  
11 hypothetical abrupt explicit strategy was simulated based on data reported by Neville and Cressman<sup>15</sup> (yellow  
12 points). The gradual explicit strategy was assumed to be zero because participants were less aware. At bottom, we  
13 show implicit learning predicted by an SPE error source. Note the identical saturation levels. **E.** Same as in **D,**  
14 but for implicit adaptation based on target error. Note greater implicit learning in gradual condition at the bottom row.  
15 Models in **D** and **E** were fit assuming that implicit error sensitivity and retention are identical across abrupt and  
16 gradual conditions. **F.** Here we show the implicit aftereffect on the first washout cycle (12 total trials). Model  
17 predictions for SPE learning (indep.) and target error learning (competition) are shown. Data show mean  $\pm$  SEM  
18 across participants. Error bars for model are mean and standard deviation across 20,000 bootstrapped samples.

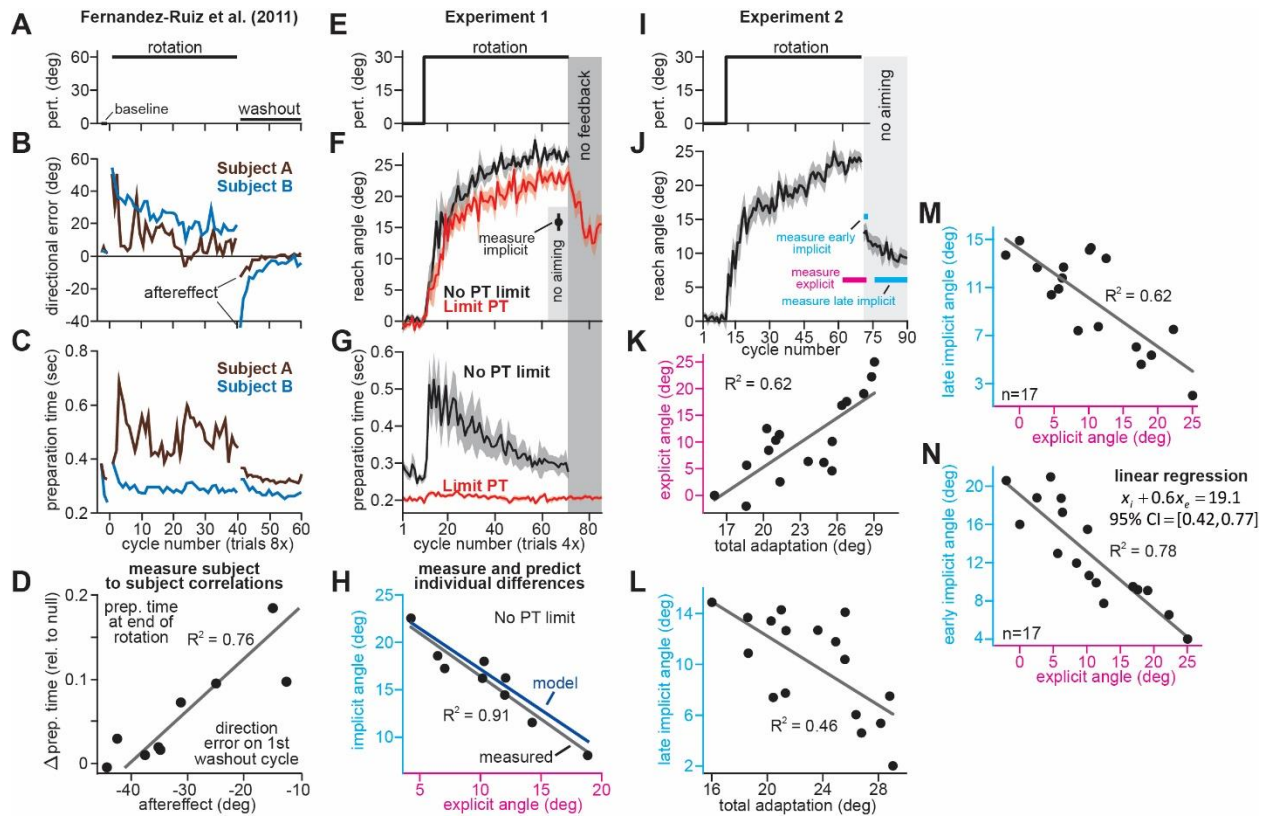

19

20 **Figure 3.** Strategy suppresses implicit learning across individual participants. **A-D.** Data are shown from Fernandez-  
 21 Ruiz et al.<sup>41</sup>. Participants were exposed to a 60° visuomotor rotation followed by a washout period. Paradigm shown  
 22 in **A**. Two learning curves for individual participants shown in **B**. Preparation time (latency between reach onset and  
 23 target presentation) shown in **C**. In **D**, participants with greater increases in preparation time (relative to baseline)  
 24 showed smaller aftereffects, suggesting less implicit adaptation. **E-F.** In Experiment 1, participants adapted to a 30°  
 25 visuomotor rotation. The paradigm is shown in **E**. Participants in the No PT limit group had no constraint placed on  
 26 their movement preparation time. Participants in the Limit PT group had to execute movements with restricted  
 27 preparation time. Learning curves for each group shown in **F**. Note that Limit PT adaptation ended with a no feedback  
 28 period where memory retention was measured. Note that No PT limit adaptation ended with a cycle of exclusion  
 29 trials where participants were instructed to reach straight to the target without re-aiming and without any feedback  
 30 (no aiming, measure implicit). Movement preparation time for each group is shown in **G**. In **H**, we show the total  
 31 implicit and explicit adaptation in each participant in the No PT limit condition. Implicit learning measured during  
 32 the terminal no aiming probe. Explicit learning represents difference between total adaptation (last 10 rotation  
 33 cycles) and implicit probe. The black line shows a linear regression. The blue line shows the theoretical relationship  
 34 predicted by the competition equation which assumes implicit system adapts to target error. The parameters for  
 35 this model prediction (implicit error sensitivity and retention) were measured in the Limit PT group. **I-N.** In  
 36 Experiment 2, participants performed a similar experiment remotely using a personal computer. The paradigm is  
 37 shown in **I**. The learning curve is shown in **J**. Implicit learning was measured at the end of adaptation over a 20-cycle  
 38 period where participants were instructed to reach straight to the target without aiming and without feedback (no  
 39 aiming seen in **I** and **J**). We measured explicit adaptation as difference between total adaptation and reach angle on  
 40 first no aiming cycle (**J**, measure explicit). We measured early implicit aftereffect as reach angle on first no aiming  
 41 cycle (**J**, measure early implicit). We measured late implicit aftereffect as mean reach angle over last 15 no aiming  
 42 cycles (**J**, measure late implicit). In **K** we show how explicit adaptation varies with total adaptation. In **L** we show how

43 late implicit aftereffect varies with total adaptation. In **M** we show how explicit adaptation varies with late implicit  
44 aftereffect. In **N** we show how explicit adaptation varies with early implicit aftereffect. Points in **I-N** show individual  
45 participants. Lines indicate linear regressions. Error bars show mean  $\pm$  SEM across participants.

46

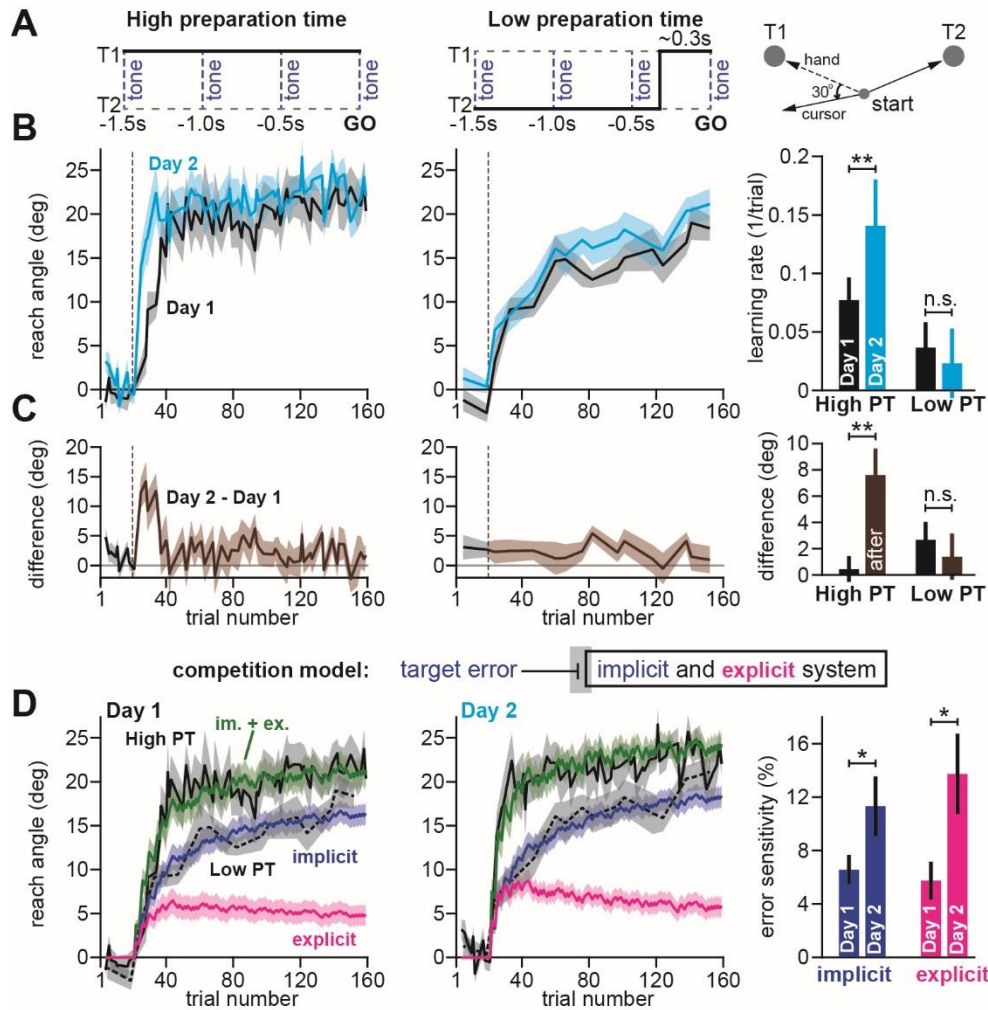

47

48 **Figure 4.** Model predicts increase in implicit error sensitivity without any change in implicit learning rate. **A.** Haith  
 49 and colleagues<sup>28</sup> instructed participants to reach to Targets T1 and T2 (right). Participants were exposed to a 30°  
 50 visuomotor rotation at Target T1 only. Participants reached to the target coincident with a tone. Four tones were  
 51 played with a 500 ms inter-tone-interval. On most trials (80%) the same target was displayed during all four tones  
 52 (left, High preparation time or High PT). On some trials (20%) the target switched approximately 300 ms prior to the  
 53 fourth tone (middle, Low preparation time or Low PT). **B.** On Day 1, participants adapted to a 30° visuomotor rotation  
 54 (Block 1, black) followed by a washout period. On Day 2, participants again experienced a 30° rotation (Block 2, blue).  
 55 At left, we show the reach angle expressed on High PT trials during Blocks 1 and 2. Dashed vertical line shows  
 56 perturbation onset. At middle, we show the same but for Low PT trials. At right, we show learning rate on High and  
 57 Low PT trials, during each block. **C.** As an alternative to the rate measure shown at right in **B**, we calculated the  
 58 difference between reach angle on Blocks 1 and 2. At left and middle, we show the learning curve differences for  
 59 High and Low PT trials, respectively. At right, we show difference in learning curves before (black) and after (brown)  
 60 the perturbation. **D.** We fit a state space model to the learning curves in Blocks 1 and 2 assuming that target errors  
 61 drove implicit adaptation. Low PT trials captured the implicit system (blue). High PT trials captured the sum implicit  
 62 and explicit system (green). Explicit trace (magenta) is the difference between the High and Low PT predictions. At  
 63 right, we show error sensitivities predicted by the model. Error bars show mean  $\pm$  SEM, except for the learning rate  
 64 in **B** which displays the median. Paired t-tests are used in **C** and **D**. Wilcoxon signed rank test is used in **B**. Statistics:  
 65 n.s. means no significant difference, \* $p < 0.05$ , \*\* $p < 0.01$ .



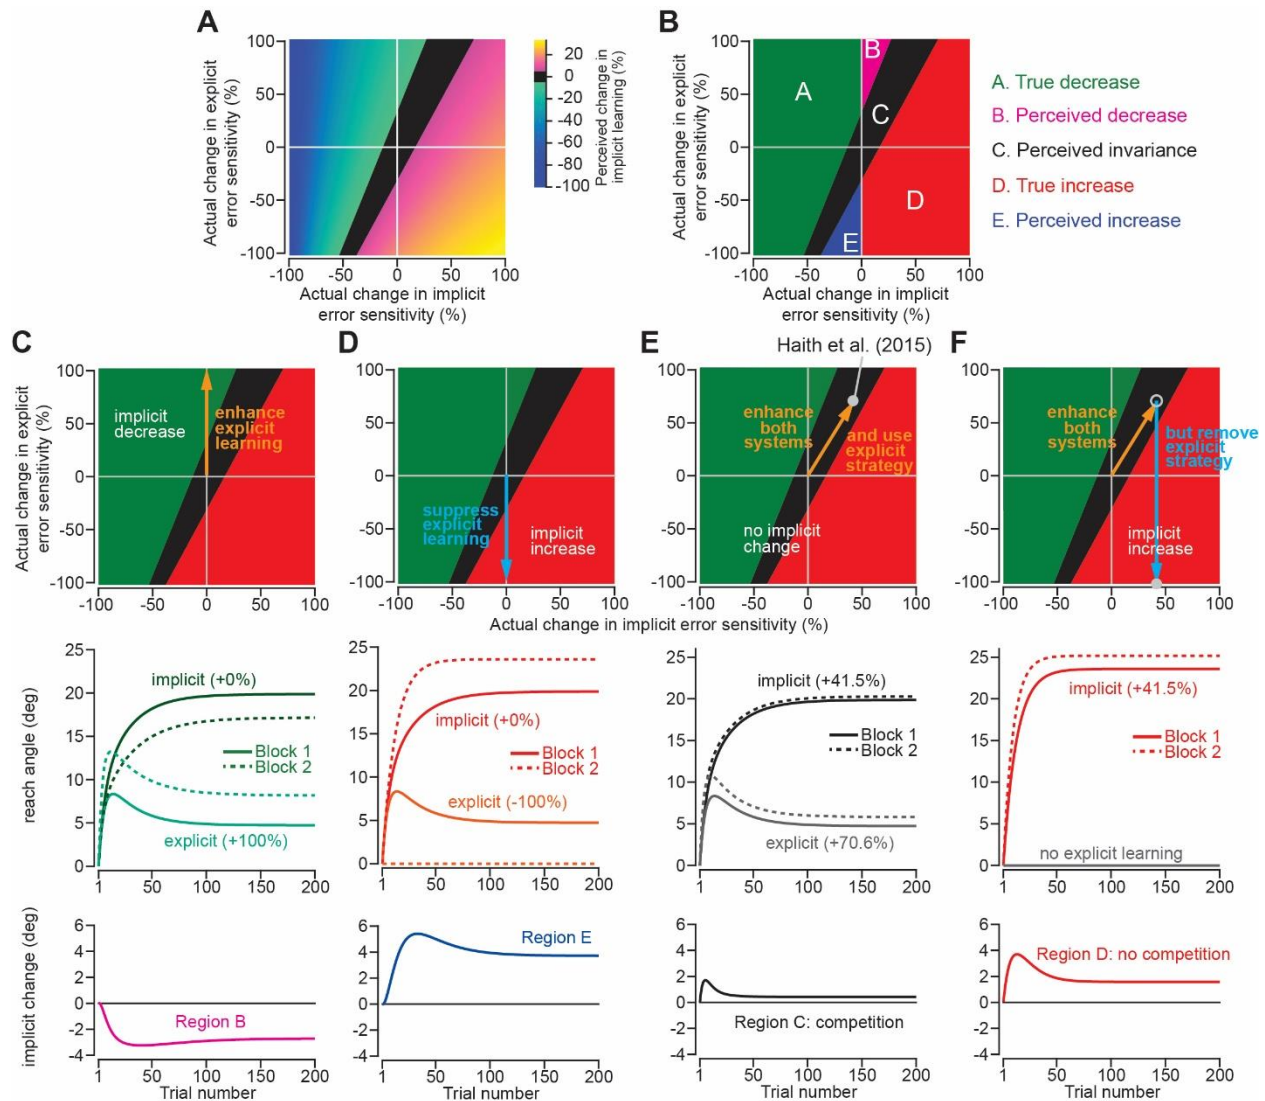

66

67 **Figure 5.** Changes in implicit adaptation depend on both implicit and explicit error sensitivity. **A.** Here we depict the  
 68 competition map. The x-axis shows change in implicit error sensitivity between reference and test conditions. The  
 69 y-axis shows change in explicit error sensitivity. Colors indicate the percent change in implicit adaptation (measured  
 70 at steady-state) from the reference to test conditions. Black region denotes an absolute change less than 5%. The  
 71 map was constructed with Eq. (8). **B.** The map can be described in terms of 5 different regions. In Region A (true  
 72 increase), implicit error sensitivity and total implicit adaption both increase in test condition. Region D is same,  
 73 for decreases in error sensitivity and total adaptation. In Region B (perceived decrease) implicit adaption decreases  
 74 though its error sensitivity is higher or same. In Region E (perceived increase), implicit adaptation increases though  
 75 its error sensitivity is lower or same. Region C shows a perceived invariance where implicit adaptation changes less  
 76 than 5%. **C.** Top: effect of suppressing explicit learning. Middle: implicit and explicit learning shown in Blocks 1 and  
 77 2, where explicit error sensitivity increases 100%. Bottom: implicit learning change (Block 1 to 2). **D.** Top: effect of  
 78 enhancing explicit learning. Middle: implicit and explicit learning shown in Blocks 1 and 2, where only difference is  
 79 100% increase in explicit error sensitivity. Bottom: change in implicit learning (Block 1 to 2). **E.** Top: model simulation  
 80 for Haith et al.<sup>28</sup>. Middle: implicit and explicit learning during Blocks 1 and 2 where implicit error sensitivity increases  
 81 by 41.5% and explicit error sensitivity increases by 70.6%. Bottom: negligible change in implicit learning (Block 1 to  
 82 2). **F.** Same as in **E** except here explicit strategy is suppressed during Blocks 1 and 2.

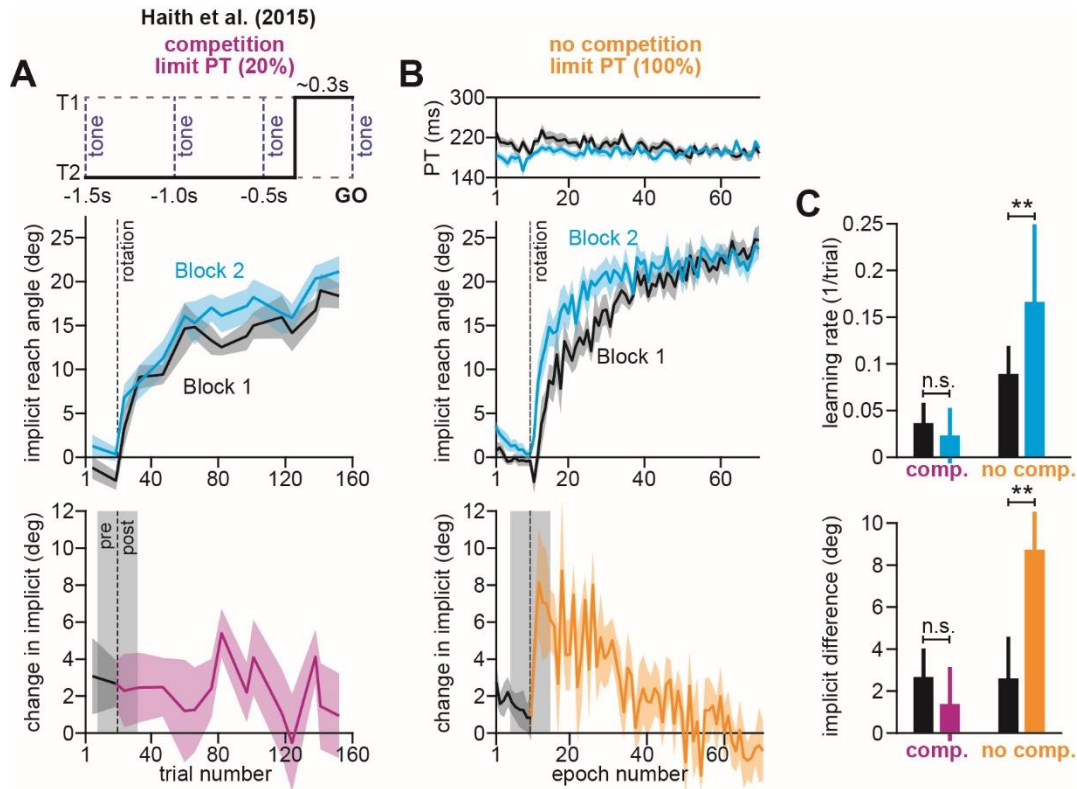

83

84 **Figure 6.** Removing explicit strategy reveals savings in implicit adaptation. **A.** Top: Low preparation time (Low PT)  
 85 trials in Haith and colleagues<sup>28</sup> used to isolate implicit learning. Middle: learning during Low PT in Blocks 1 and 2.  
 86 Bottom: difference in Low PT learning between Blocks 1 and 2. **B.** Similar to **A**, but here (Experiment 3) explicit  
 87 learning was suppressed on every trial, as opposed to only 20% of trials. To suppress explicit strategy, we restricted  
 88 reaction time on every trial. The reaction time during Blocks 1 and 2 is shown at top. At middle, we show how  
 89 participants adapted to the rotation under constrained reaction time. At bottom, we show the difference between  
 90 the learning curves in Blocks 1 and 2. **C.** Here we measured savings in Haith et al. (20% of trials had reaction time  
 91 limit) and Experiment 3 (100% of trials had reaction time limit). At top, we quantify savings by fitting an exponential  
 92 curve to each learning curve. Bars show the rate parameter associated with the exponential. At bottom, we quantify  
 93 savings by comparing how Blocks 1 and 2 differed before perturbation onset (black), and after perturbation onset  
 94 (purple and yellow). Error bars show mean  $\pm$  SEM, except for the learning rate at the top of **C** which shows the  
 95 median. Paired t-tests are used at the bottom of **C**. Wilcoxon signed rank tests are used at the top of **C**. Statistics:  
 96 n.s. means no significant difference, \*\* $p < 0.01$ .

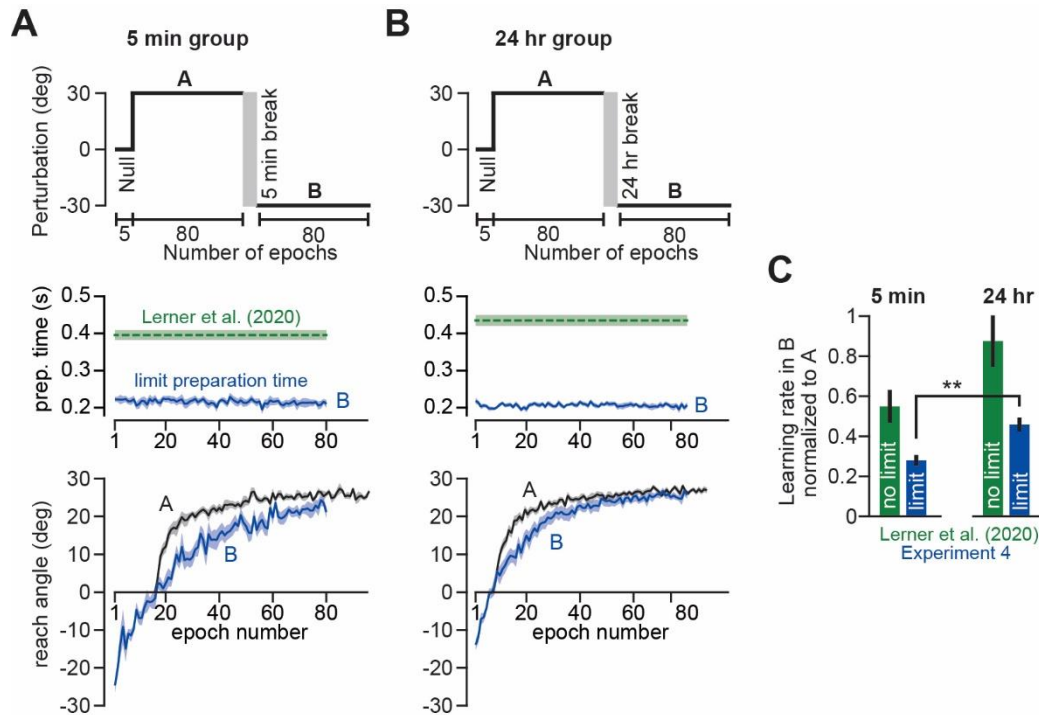

97

98 **Figure 7.** Removing explicit strategy reveals anterograde interference in implicit adaptation. **A.** Top: participants  
 99 were adapted to a 30° rotation (A). Following a 5-minute break, participants were then exposed to a -30° rotation  
 100 (B). This A-B paradigm was similar to that of Lerner & Albert et al.<sup>26</sup>. Middle: to isolate implicit adaptation, we  
 101 imposed strict reaction time constraints on every trial. Under these constraints, reaction time (blue) was reduced by  
 102 approximately 50% over that observed in the self-paced condition (green) studied by Lerner & Albert et al.<sup>26</sup> Bottom:  
 103 learning curves during A and B in Experiment 4; under reaction time constraints, the interference paradigm produced  
 104 a strong impairment in the rate of implicit adaptation. To compare learning during A and B, B period learning was  
 105 reflected across y-axis. Furthermore, the curves were temporally aligned such that an exponential fit to the A period  
 106 and exponential fit to the B period intersected when the reach angle crossed 0°. This alignment visually highlights  
 107 differences in the learning rate during the A and B periods. **B.** Here we show the same analysis as in **A** but when  
 108 exposures A and B were separated by 24 hours. **C.** To measure the amount of anterograde interference on the  
 109 implicit learning system, we fit an exponential to the A and B period behavior. Here we show the B period exponential  
 110 rate parameter divided by the A period rate parameter (values less than 1 indicate a slowing of adaptation). At left  
 111 we show the results for the 5-minute group. At right we show the results for the 24-hr group. In green we show data  
 112 from Lerner & Albert et al.<sup>26</sup> where reaction time was unrestricted (no limit). In blue we show our new dataset  
 113 (Experiment 4) where reaction time was limited to isolate implicit learning. A two-sample t-test was used to test for  
 114 differences in the implicit impairment at 5 minutes and 24 hours. Error bars show mean  $\pm$  SEM. Statistics: \*\* $p < 0.01$ .  
 115  
 116

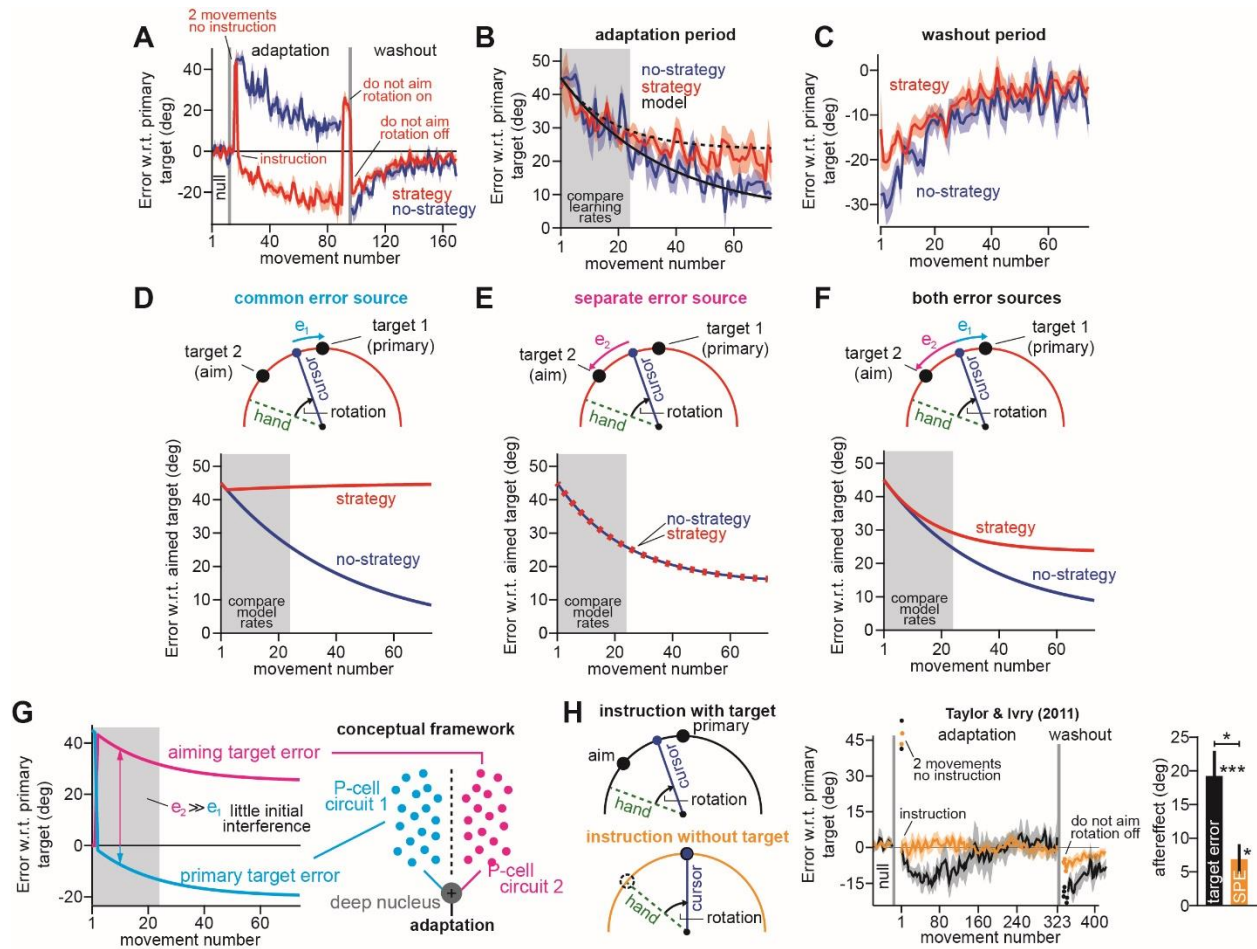

117  
 118 **Figure 8.** Two visual targets create two implicit error sources. **A.** Figure shows data reported in Mazzoni and  
 119 Krakauer<sup>12</sup>. Blue shows error between primary target and cursor during adaptation and washout. Red shows the  
 120 same, but in a strategy group that was instructed to aim to a neighboring target (instruction) to eliminate target  
 121 errors, once participants experienced two large errors (2 cycles no instruction). **B.** Here we show the error between  
 122 the cursor and the aimed target during the adaptation period. These curves are the same as in **A** except we use the  
 123 aimed target rather than primary target, so as to better compare learning curves across groups. **C.** The washout  
 124 period reported in **A**. Here error is relative to primary target, though in this case aimed and primary targets are the  
 125 same. **D.** Here we modeled behavior when implicit learning adapts to primary target errors. The primary target error  
 126 is shown in  $e_1$  at top. Note that no-strategy learning resembles data. However, strategy learning exhibits no drift  
 127 because the implicit system has zero error. Note here that the primary target error of  $0^\circ$  is a  $45^\circ$  aimed target error  
 128 in the strategy group. **E.** Similar to **D**, except here the implicit system adapts to errors between the cursor and aimed  
 129 target. This error is schematized in  $e_2$  at top. Note that this model predicts identical learning in strategy and no-  
 130 strategy groups. **F.** In this model, the strategy group adapts to both the primary target error and the aimed target  
 131 error ( $e_1$  and  $e_2$  at top). The no-strategy group adapts only to the primary target error. Learning parameters are  
 132 identical across groups. **G.** At left, we show how aiming target and primary target errors evolve in the strategy group  
 133 in **F**. At right, we imagine a potential neural substrate for implicit learning. The primary target error and aiming target  
 134 error engage two different sub-populations of Purkinje cells in the cerebellar cortex. These two implicit learning  
 135 modules combine at the deep nucleus. **H.** Figure shows data reported in Taylor and Ivry<sup>21</sup>. Participants performed a  
 136 task similar to **A**. Before adaptation, participants were taught how to re-aim their reach angles. In the “instruction  
 137 with target” group, participants re-aimed during adaptation with the aide of neighboring aiming targets (top-left).

138 In the “instruction without target” group, participants re-aimed during adaptation without any aiming targets, solely  
139 based on the remembered instruction from the baseline period. The middle shows learning curves. In both groups,  
140 the first 2 movements were uninstructed, resulting in large errors (2 movements no instruction). Note in the  
141 “instruction with target” group, there is an implicit drift as in **A**, but participants eventually reverse this by changing  
142 explicit strategy. There is no drift in the “instruction without target” group. At right, we show the implicit aftereffect  
143 measured by telling participants not to aim (first no feedback, no aiming cycle post-adaptation). Greater implicit  
144 adaptation resulted from physical target. Error bars show mean  $\pm$  SEM. Statistics: \* $p < 0.05$ , \*\*\* $p < 0.001$ .

145

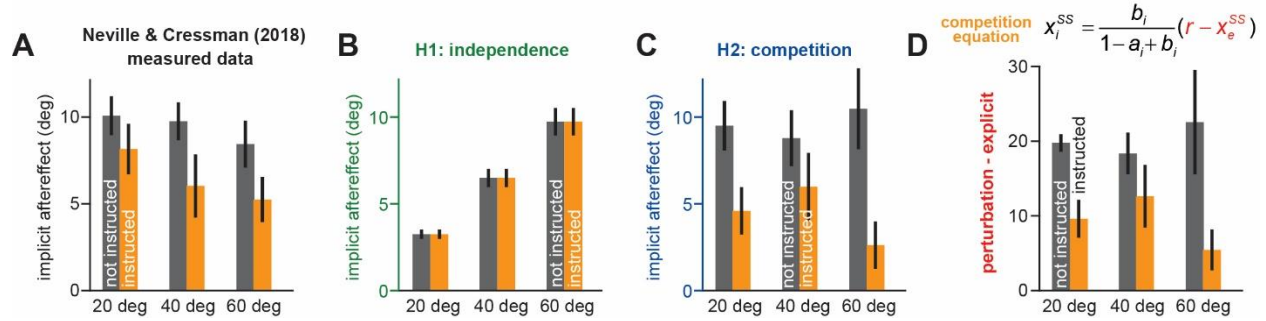

146  
 147 **Figure S1.** Changes in implicit adaptation in response to awareness and rotation size. Data reported from Neville and  
 148 Cressman (2018)<sup>15</sup>. **A.** Participants were separated into 1 of 6 groups. Groups differed based on verbal instruction  
 149 (instructed yellow; non-instructed gray) and rotation magnitude (20° left; 40° middle; 60° right). Here we show  
 150 implicit learning measured using exclusion trials (reach without re-aiming) at the end of adaptation. **B.** Here we show  
 151 implicit aftereffects predicted by a model where implicit system learns from SPE only. **C.** Here we show implicit  
 152 aftereffects predicted by a model where implicit system learns from target error only. **D.** The competition model  
 153 (target error learning) predicts that implicit learning will be proportional to the difference between the rotation size  
 154 and the total explicit strategy. Here we show this quantity for all 6 experimental groups. Note that model predictions  
 155 in **B** and **C** assume that implicit error sensitivity and retention factor are the same across all 6 experimental groups.  
 156 Error bars for data show mean  $\pm$  SEM. Error bars for model predictions refer to mean and standard deviation across  
 157 10,000 bootstrapped samples.  
 158

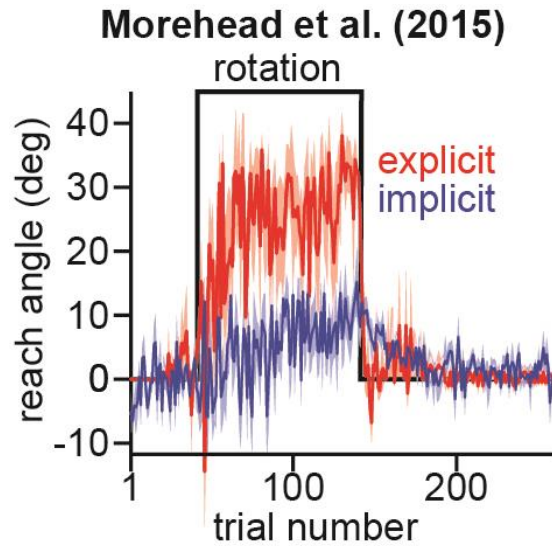

159  
160 **Figure S2.** Explicit strategies are rapidly disengaged during washout. Data are reported from Morehead et al.  
161 (2015)<sup>34</sup>. Here participants adapted to a 45° rotation, followed by an extended washout period. Explicit learning was  
162 measured by asking subjects to report their aiming angle using a ring of visual landmarks. Implicit learning was  
163 measured as the difference between the observed reach angle and the direction of reported aim. In this task,  
164 participants reached on each trial to 1 of 4 targets. Note the sharp change in explicit angle to zero at the start of the  
165 washout period. The aftereffect during a washout period is thought to reflect implicit adaptation. This requires that  
166 explicit strategies are rapidly disengaged during washout, consistent with these data. Error bars show mean  $\pm$  SEM.  
167

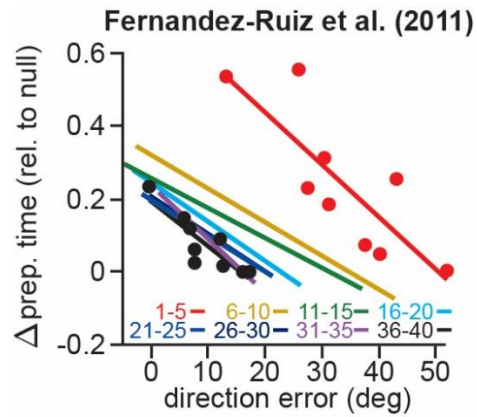

168  
169 **Figure S3.** Participants that increase their preparation time exhibit greater total adaptation. Data are reported from  
170 Fernandez-Ruiz and colleagues<sup>41</sup>. In this experiment, participants made 10 cm reaching movements to 1 of 8 targets,  
171 pseudorandomly arranged in cycles of 8 trials. Here we report data from the unconstrained RT group described in  
172 the original manuscript. The experiment started with 3 cycles of null rotation trials, followed by 40 cycles of a 60°  
173 rotation. The authors calculated change in movement preparation time (relative to baseline period) on each trial.  
174 Here the authors calculated the directional error and the change in preparation time across 5-cycle periods spanning  
175 the entire 40-cycle rotation. The points show individual subjects for the first 5 and last 5 rotation cycles. All lines  
176 show the linear regression across individual subjects in each color-coded period. Note that each line has a negative  
177 slope, indicating that participants who increased their reaction time more consistently exhibited smaller directional  
178 errors through the entire rotation period.  
179



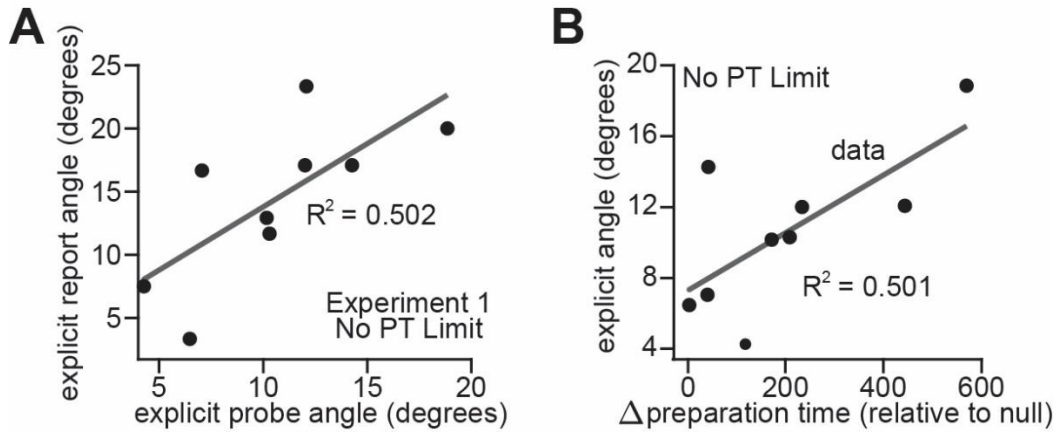

180  
181 **Figure S4.** Alternate measures of explicit strategy. **A.** In the No PT limit participants in Experiment 1, we empirically  
182 measured explicit re-aiming at the end of adaptation. To do this, we instructed participants to move their hand  
183 through the target without any re-aiming. Reach angle precipitously dropped after this instruction. The total change  
184 in reach angle (averaged across all 4 targets) represented each participant's strategic re-aiming (x-axis). To validate  
185 this empirical measure, we also asked participants to report their explicit strategies after the probe period.  
186 Participants were shown a ring of circles surrounding each target and asked to indicate which circle best represented  
187 their aiming during at the end of the experiment. This reported explicit measure averaged across all 4 targets is  
188 shown on the y-axis. Each dot represents one participant. **B.** Explicit strategies have also been shown to correlate  
189 with increases in movement preparation time. Here we show the total explicit strategy measured (via the no aiming  
190 probe trial in No PT limit in Experiment 1) as a function of change in preparation time for each individual participant.  
191 The change in preparation time was calculated as the difference between the mean preparation time over the first  
192 20 rotation cycles and the last 3 null period cycles. The solid lines in **A** and **B** show a linear regression across individual  
193 participants.  
194

Aftereffects at target and aim direction

Comparing aim reports to implicit learning measured at target

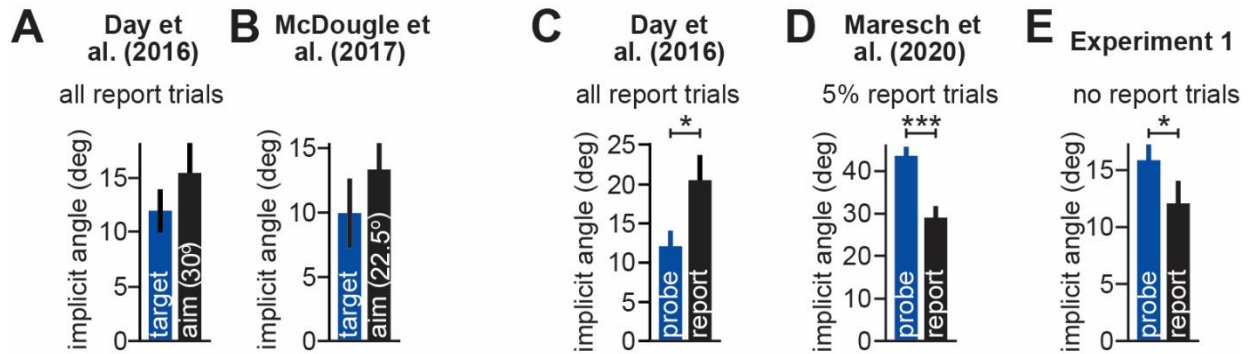

195  
 196 **Figure S5.** Differences in generalization across visuomotor rotation tasks. **A.** Data collected by Day et al.<sup>72</sup>, reported  
 197 in Fig. 2 of the original manuscript. Here, participants were exposed to a 45° rotation while reaching to a single  
 198 target. On each trial they were asked to report their aiming direction, using a ring of visual landmarks. In the “target”  
 199 group, implicit aftereffects were measured at the trained target location. In the “aim” group, implicit aftereffects  
 200 were probed at a target location 30° away from the trained target, consistent with the direction of the most  
 201 frequently reported aim. Here we show data from the first aftereffect cycle after the rotation period. **B.** Similar to **A**  
 202 except for data reported by McDougle et al.<sup>71</sup> (Fig. 3A of the original manuscript). Participants were also exposed to  
 203 a 45° rotation while reaching to a single target. At the end of the experiment, participants were exposed to an  
 204 aftereffect block where participants were told to move straight to the target without re-aiming. Here we take two  
 205 relevant points from the generalization curve measured at the end of learning. The “target” condition represents  
 206 aftereffects probed at the training target. The “aim” condition shows the aftereffect measured at 22.5° away from  
 207 the primary target, which was the target closest to the mean reported explicit re-aiming strategy of 26.2°. **C.** Data  
 208 again from Day et al.<sup>72</sup>. The “probe” implicit learning measure is the same as **A**. The “report” condition shows the  
 209 amount of implicit learning estimated by subtracting the reported explicit strategy from the reported reach angle  
 210 on the last cycle of the rotation. **D.** Similar to **C**, but for the intermittent reporting (IR-E) group reported by Maresch  
 211 et al.<sup>75</sup> (Fig. 4b of the original manuscript). In this group aim was only intermittently reported (4 trials for every 80  
 212 normal adaptation trials). Thus, in most cases, participants only had to attend to a single target when reaching. The  
 213 authors also used 8 training targets (as opposed to 1 in **A-C**). The “probe” condition corresponds to the total implicit  
 214 learning measured at the end of adaptation by telling participants to reach without re-aiming. The “report” condition  
 215 corresponds to the total implicit learning estimated at the end of adaptation by subtracting the reported aim  
 216 direction from the measured reach angle. **E.** Here we report implicit learning measured using the “probe” and  
 217 “report” conditions in Experiment 1, analogous to the measures described in **D**. Error bars show mean ± SEM.  
 218

## References

1. Milner, T. E. & Franklin, D. W. Impedance control and internal model use during the initial stage of adaptation to novel dynamics in humans. *J. Physiol.* **567**, 651–664 (2005).
2. Franklin, D. W. *et al.* CNS learns stable, accurate, and efficient movements using a simple algorithm. *J. Neurosci.* **28**, 11165–11173 (2008).
3. Albert, S. T. & Shadmehr, R. The Neural Feedback Response to Error As a Teaching Signal for the Motor Learning System. *J. Neurosci.* **36**, 4832–4845 (2016).
4. Kawato, M. Internal models for motor control and trajectory planning. *Curr. Opin. Neurobiol.* **9**, 718–727 (1999).
5. Wolpert, D. M., Diedrichsen, J. & Flanagan, J. R. Principles of sensorimotor learning. *Nat. Rev. Neurosci.* **12**, 739–751 (2011).
6. Thoroughman, K. A. & Shadmehr, R. Electromyographic correlates of learning an internal model of reaching movements. *J. Neurosci.* **19**, 8573–8588 (1999).
7. Donchin, O. *et al.* Cerebellar regions involved in adaptation to force field and visuomotor perturbation. *J. Neurophysiol.* **107**, 134–147 (2012).
8. Krakauer, J. W., Ghilardi, M.-F. & Ghez, C. Independent learning of internal models for kinematic and dynamic control of reaching. *Nat. Neurosci.* **2**, 1026–1031 (1999).
9. Smith, M. A., Ghazizadeh, A. & Shadmehr, R. Interacting adaptive processes with different timescales underlie short-term motor learning. *PLoS Biol.* **4**, e179 (2006).
10. Kim, S., Ogawa, K., Lv, J., Schweighofer, N. & Imamizu, H. Neural Substrates Related to Motor Memory with Multiple Timescales in Sensorimotor Adaptation. *PLoS Biol.* **13**, e1002312 (2015).
11. Taylor, J. A., Krakauer, J. W. & Ivry, R. B. Explicit and Implicit Contributions to Learning in a Sensorimotor Adaptation Task. *J. Neurosci.* **34**, 3023–3032 (2014).
12. Mazzoni, P. & Krakauer, J. W. An implicit plan overrides an explicit strategy during visuomotor adaptation. *J. Neurosci.* **26**, 3642–3645 (2006).
13. Morehead, J. R., Taylor, J. A., Parvin, D. E. & Ivry, R. B. Characteristics of Implicit Sensorimotor Adaptation Revealed by Task-irrelevant Clamped Feedback. *J. Cogn. Neurosci.* **29**, 1061–1074 (2017).
14. Miyamoto, Y. R., Wang, S. & Smith, M. A. Implicit adaptation compensates for erratic explicit strategy in human motor learning. *Nat. Neurosci.* **23**, 443–455 (2020).
15. Neville, K.-M. & Cressman, E. K. The influence of awareness on explicit and implicit contributions to visuomotor adaptation over time. *Exp. Brain Res.* **236**, 2047–2059 (2018).
16. Benson, B. L., Anguera, J. A. & Seidler, R. D. A spatial explicit strategy reduces error but interferes with sensorimotor adaptation. *J. Neurophysiol.* **105**, 2843–2851 (2011).
17. Leow, L.-A., Marinovic, W., de Rugy, A. & Carroll, T. J. Task errors drive memories that improve sensorimotor adaptation. *J. Neurosci.* (2020). doi:10.1523/JNEUROSCI.1506-19.2020
18. Langsdorf, L., Maresch, J., Hegele, M., McDougle, S. D. & Schween, R. Prolonged reaction times eliminate residual errors in visuomotor adaptation. *bioRxiv* (2019). doi:10.1101/2019.12.26.888941
19. Körding, K. P. & Wolpert, D. M. The loss function of sensorimotor learning. *Proc. Natl. Acad. Sci. U. S. A.* **101**, 9839 LP – 9842 (2004).
20. Tseng, Y.-W., Diedrichsen, J., Krakauer, J. W., Shadmehr, R. & Bastian, A. J. Sensory prediction errors drive cerebellum-dependent adaptation of reaching. *J. Neurophysiol.* **98**, 54–62 (2007).
21. Taylor, J. A. & Ivry, R. B. Flexible cognitive strategies during motor learning. *PLoS Comput. Biol.* **7**, e1001096 (2011).
22. Wong, A. L. & Shelhamer, M. Using prediction errors to drive saccade adaptation: the implicit double-step task. *Exp. brain Res.* **222**, 55–64 (2012).
23. Kim, H. E., Parvin, D. E. & Ivry, R. B. The influence of task outcome on implicit motor learning.

- Elife* **8**, e39882 (2019).
24. McDougle, S. D., Bond, K. M. & Taylor, J. A. Explicit and Implicit Processes Constitute the Fast and Slow Processes of Sensorimotor Learning. *J. Neurosci.* **35**, 9568–9579 (2015).
  25. Sing, G. C. & Smith, M. A. Reduction in learning rates associated with anterograde interference results from interactions between different timescales in motor adaptation. *PLoS Comput. Biol.* **6**, e1000893 (2010).
  26. Lerner, G. *et al.* The Origins of Anterograde Interference in Visuomotor Adaptation. *Cereb. Cortex* **30**, 4000–4010 (2020).
  27. Caithness, G. *et al.* Failure to consolidate the consolidation theory of learning for sensorimotor adaptation tasks. *J. Neurosci.* **24**, 8662–8671 (2004).
  28. Haith, A. M., Huberdeau, D. M. & Krakauer, J. W. The Influence of Movement Preparation Time on the Expression of Visuomotor Learning and Savings. *J. Neurosci.* **35**, 5109–5117 (2015).
  29. Coltman, S. K., Cashaback, J. G. A. & Gribble, P. L. Both fast and slow learning processes contribute to savings following sensorimotor adaptation. *J. Neurophysiol.* **121**, 1575–1583 (2019).
  30. Kojima, Y., Iwamoto, Y. & Yoshida, K. Memory of Learning Facilitates Saccadic Adaptation in the Monkey. *J. Neurosci.* **24**, 7531–7539 (2004).
  31. Medina, J. F., Garcia, K. S. & Mauk, M. D. A mechanism for savings in the cerebellum. *J. Neurosci.* **21**, 4081–4089 (2001).
  32. Mawase, F., Shmuelof, L., Bar-Haim, S. & Karniel, A. Savings in locomotor adaptation explained by changes in learning parameters following initial adaptation. *J. Neurophysiol.* **111**, 1444–1454 (2014).
  33. Huberdeau, D. M., Krakauer, J. W. & Haith, A. M. Practice induces a qualitative change in the memory representation for visuomotor learning. *J. Neurophysiol.* **122**, 1050–1059 (2019).
  34. Morehead, J. R., Qasim, S. E., Crossley, M. J. & Ivry, R. Savings upon Re-Aiming in Visuomotor Adaptation. *J. Neurosci.* **35**, 14386–14396 (2015).
  35. Avraham, G., Keizman, M. & Shmuelof, L. Environmental Consistency Modulation of Error Sensitivity During Motor Adaptation is Explicitly Controlled. *J. Neurophysiol.* (2019). doi:10.1152/jn.00080.2019
  36. Avraham, G., Morehead, J. R., Kim, H. E. & Ivry, R. B. Re-exposure to a sensorimotor perturbation produces opposite effects on explicit and implicit learning processes. *bioRxiv* 2020.07.16.205609 (2020). doi:10.1101/2020.07.16.205609
  37. Albert, S. T. *et al.* An implicit memory of errors limits human sensorimotor adaptation. *bioRxiv* 868406 (2020). doi:10.1101/868406
  38. Yin, C. & Wei, K. Savings in sensorimotor adaptation without an explicit strategy. *J. Neurophysiol.* **123**, 1180–1192 (2020).
  39. Albert, S. T. & Shadmehr, R. Estimating properties of the fast and slow adaptive processes during sensorimotor adaptation. *J. Neurophysiol.* **119**, 1367–1393 (2018).
  40. Thoroughman, K. & Shadmehr, R. Learning of action through adaptive combination of motor primitives. *Nature* **407**, 742–7 (2000).
  41. Fernandez-Ruiz, J., Wong, W., Armstrong, I. T. & Flanagan, J. R. Relation between reaction time and reach errors during visuomotor adaptation. *Behav. Brain Res.* **219**, 8–14 (2011).
  42. Saijo, N. & Gomi, H. Multiple Motor Learning Strategies in Visuomotor Rotation. *PLoS One* **5**, e9399 (2010).
  43. Shadmehr, R., Brandt, J. & Corkin, S. Time-dependent motor memory processes in amnesic subjects. *J. Neurophysiol.* **80**, 1590–1597 (1998).
  44. Vaswani, P. A. *et al.* Persistent Residual Errors in Motor Adaptation Tasks: Reversion to Baseline and Exploratory Escape. *J. Neurosci.* **35**, 6969–6977 (2015).
  45. Kim, H. E., Morehead, J. R., Parvin, D. E., Moazzezi, R. & Ivry, R. B. Invariant errors reveal

- limitations in motor correction rather than constraints on error sensitivity. *Commun. Biol.* **1**, 19 (2018).
46. Werner, S. *et al.* Awareness of Sensorimotor Adaptation to Visual Rotations of Different Size. *PLoS One* **10**, e0123321 (2015).
  47. McDougle, S. D. & Taylor, J. A. Dissociable cognitive strategies for sensorimotor learning. *Nat. Commun.* **10**, 40 (2019).
  48. Herzfeld, D. J., Vaswani, P. A., Marko, M. K. & Shadmehr, R. A memory of errors in sensorimotor learning. *Science (80-. )*. **345**, 1349–1353 (2014).
  49. Zarahn, E., Weston, G. D., Liang, J., Mazzoni, P. & Krakauer, J. W. Explaining Savings for Visuomotor Adaptation: Linear Time-Invariant State-Space Models Are Not Sufficient. *J. Neurophysiol.* **100**, 2537–2548 (2008).
  50. Huberdeau, D. M., Haith, A. M. & Krakauer, J. W. Formation of a long-term memory for visuomotor adaptation following only a few trials of practice. *J. Neurophysiol.* **114**, 969–977 (2015).
  51. Hwang, E. J., Smith, M. A. & Shadmehr, R. Dissociable effects of the implicit and explicit memory systems on learning control of reaching. *Exp. brain Res.* **173**, 425–437 (2006).
  52. Milner, B. *Les troubles de la memoire accompagnant des lesions hippocampiques bilaterales. Physiologie de hippocampe* (1962).
  53. Gabrieli, J. D., Corkin, S., Mickel, S. F. & Growdon, J. H. Intact acquisition and long-term retention of mirror-tracing skill in Alzheimer’s disease and in global amnesia. *Behav. Neurosci.* **107**, 899–910 (1993).
  54. Smith, M. A. & Shadmehr, R. Intact ability to learn internal models of arm dynamics in Huntington’s disease but not cerebellar degeneration. *J. Neurophysiol.* **93**, 2809–2821 (2005).
  55. Izawa, J., Criscimagna-Hemminger, S. E. & Shadmehr, R. Cerebellar Contributions to Reach Adaptation and Learning Sensory Consequences of Action. *J. Neurosci.* **32**, 4230–4239 (2012).
  56. Wong, A. L., Marvel, C. L., Taylor, J. A. & Krakauer, J. W. Can patients with cerebellar disease switch learning mechanisms to reduce their adaptation deficits? *Brain* **142**, 662–673 (2019).
  57. Becker, M. I. & Person, A. L. Cerebellar Control of Reach Kinematics for Endpoint Precision. *Neuron* **103**, 335–348.e5 (2019).
  58. Morton, S. M. & Bastian, A. J. Cerebellar contributions to locomotor adaptations during splitbelt treadmill walking. *J. Neurosci.* **26**, 9107–9116 (2006).
  59. Kording, K. P., Tenenbaum, J. B. & Shadmehr, R. The dynamics of memory as a consequence of optimal adaptation to a changing body. *Nat. Neurosci.* **10**, 779–786 (2007).
  60. MacLeod, C. M. Forgotten but Not Gone: Savings for Pictures and Words in Long-Term Memory. *J. Exp. Psychol.* **14**, 195–212 (1988).
  61. Ebbinghaus, H. *Über das Gedächtnis.* (Dunacker and Humblot, 1885).
  62. Kitago, T., Ryan, S. L., Mazzoni, P., Krakauer, J. W. & Haith, A. M. Unlearning versus savings in visuomotor adaptation: comparing effects of washout, passage of time, and removal of errors on motor memory. *Front. Hum. Neurosci.* **7**, 307 (2013).
  63. Leow, L.-A., de Rugy, A., Marinovic, W., Riek, S. & Carroll, T. J. Savings for visuomotor adaptation require prior history of error, not prior repetition of successful actions. *J. Neurophysiol.* **116**, 1603–1614 (2016).
  64. Wilterson, S. A. & Taylor, J. A. Implicit visuomotor adaptation remains limited after several days of training. *bioRxiv* (2019). doi:10.1101/711598
  65. Miall, R. C., Jenkinson, N. & Kulkarni, K. Adaptation to rotated visual feedback: a re-examination of motor interference. *Exp. Brain Res.* **154**, 201–210 (2004).
  66. de Brouwer, A. J., Albaghdadi, M., Flanagan, J. R. & Gallivan, J. P. Using gaze behavior to parcellate the explicit and implicit contributions to visuomotor learning. *J. Neurophysiol.* **120**,

- 1602–1615 (2018).
67. Maresch, J. & Donchin, O. Reporting affects explicit knowledge in visuomotor rotations in ways not measured by reporting. *bioRxiv* (2019). doi:10.1101/702290
  68. Bromberg, Z., Donchin, O. & Haar, S. Eye Movements during Visuomotor Adaptation Represent Only Part of the Explicit Learning. *eNeuro* **6**, ENEURO.0308-19.2019 (2019).
  69. Bond, K. M. & Taylor, J. A. Flexible explicit but rigid implicit learning in a visuomotor adaptation task. *J. Neurophysiol.* **113**, 3836–3849 (2015).
  70. Kagerer, F. A., Contreras-Vidal, J. L. & Stelmach, G. E. Adaptation to gradual as compared with sudden visuo-motor distortions. *Exp. brain Res.* **115**, 557–561 (1997).
  71. McDougale, S. D., Bond, K. M. & Taylor, J. A. Implications of plan-based generalization in sensorimotor adaptation. *J. Neurophysiol.* **118**, 383–393 (2017).
  72. Day, K. A., Roemmich, R. T., Taylor, J. A. & Bastian, A. J. Visuomotor Learning Generalizes Around the Intended Movement. *eNeuro* **3**, ENEURO.0005-16.2016 (2016).
  73. Krakauer, J. W., Pine, Z. M., Ghilardi, M. F. & Ghez, C. Learning of visuomotor transformations for vectorial planning of reaching trajectories. *J. Neurosci.* **20**, 8916–8924 (2000).
  74. Tanaka, H., Sejnowski, T. J. & Krakauer, J. W. Adaptation to Visuomotor Rotation Through Interaction Between Posterior Parietal and Motor Cortical Areas. *J. Neurophysiol.* **102**, 2921–2932 (2009).
  75. Maresch, J., Werner, S. & Donchin, O. Methods matter: your measures of explicit and implicit processes in visuomotor adaptation affect your results. *bioRxiv* (2020). doi:10.1101/702290
  76. Shadmehr, R., Smith, M. A. & Krakauer, J. W. Error correction, sensory prediction, and adaptation in motor control. *Annu Rev Neurosci* **33**, 89–108 (2010).
  77. Leow, L.-A., Marinovic, W., de Rugy, A. & Carroll, T. J. Task errors contribute to implicit aftereffects in sensorimotor adaptation. *Eur. J. Neurosci.* **48**, 3397–3409 (2018).
  78. Hanajima, R. *et al.* Modulation of error-sensitivity during a prism adaptation task in people with cerebellar degeneration. *J. Neurophysiol.* **114**, 2460–2471 (2015).
  79. Kojima, Y. & Soetedjo, R. Elimination of the error signal in the superior colliculus impairs saccade motor learning. *Proc. Natl. Acad. Sci.* **115**, E8987–E8995 (2018).
  80. Bastian, A. J., Martin, T. A., Keating, J. G. & Thach, W. T. Cerebellar ataxia: abnormal control of interaction torques across multiple joints. *J. Neurophysiol.* **76**, 492–509 (1996).
  81. Herzfeld, D. J., Kojima, Y., Soetedjo, R. & Shadmehr, R. Encoding of error and learning to correct that error by the Purkinje cells of the cerebellum. *Nat. Neurosci.* **21**, 736–743 (2018).
  82. Herzfeld, D. J., Kojima, Y., Soetedjo, R. & Shadmehr, R. Encoding of action by the Purkinje cells of the cerebellum. *Nature* **526**, 439–442 (2015).
  83. Maschke, M., Gomez, C. M., Ebner, T. J. & Konczak, J. Hereditary cerebellar ataxia progressively impairs force adaptation during goal-directed arm movements. *J. Neurophysiol.* **91**, 230–238 (2004).
  84. Martin, T. A., Keating, J. G., Goodkin, H. P., Bastian, A. J. & Thach, W. T. Throwing while looking through prisms. I. Focal olivocerebellar lesions impair adaptation. *Brain* **119** ( Pt 4), 1183–1198 (1996).
